# Supplementary material for: BN-Embedded Perylenes
Source: MDPI journal article supplement (doi:10.3390/molecules26237148), 2021-11-25
Supplement: s1 [file s1]

## Supporting Information

# BN-Embedded Perylenes

Xiangdong Fang\*

College of Chemical Science and Engineering, Tongji University, 1239 Siping Road, Yangpu, Shanghai 200092, China.

Correspondence: xdfang@tongji.edu.cn

### Table of Contents

|      |                                                                         |     |
|------|-------------------------------------------------------------------------|-----|
| I.   | General Information.....                                                | S-2 |
| II.  | Synthesis of <b>4</b> .....                                             | S-3 |
| III. | Synthesis of BN-Perylene <b>1</b> .....                                 | S-3 |
| IV.  | Synthesis of (BN) <sub>2</sub> -Perylene <b>2</b> .....                 | S-4 |
| V.   | Determination of Structures of <b>1</b> , <b>2</b> , and <b>4</b> ..... | S-4 |
| VI.  | DFT Calculations.....                                                   | S-9 |

NMR Spectra (<sup>1</sup>H, <sup>13</sup>C, <sup>11</sup>B, COSY and HSQC) and HRMS

## I. General Information

All air- and moisture-sensitive reactions were conducted with magnetic stirring in oven-dry glassware under nitrogen atmosphere using anhydrous solvents and standard Schlenk-line techniques with an MBraun Labstar-MB10 glovebox. The oxygen and moisture levels in the MBraun glovebox were constantly monitored by both oxygen and moisture analyzers to ensure O<sub>2</sub>/H<sub>2</sub>O levels below 0.1 ppm. Diethyl ether, tetrahydrofuran, and hexane were dried and distilled by treatment with sodium metal slices under a nitrogen atmosphere. Dichloromethane was dried and distilled by treatment with calcium hydride under a nitrogen atmosphere. Chemicals were purchased from chemical suppliers and used without further purification unless otherwise specified. Flash or thin-layer column chromatography was performed over silica gel (40-60  $\mu$ m) purchased from Yantai Jiangyou Co., China.

<sup>1</sup>H, <sup>13</sup>C, <sup>11</sup>B NMR spectra were collected on a Bruker ARX400 400 MHz NMR spectrometer using residue solvent peaks as an internal standard (<sup>1</sup>H NMR: CDCl<sub>3</sub> at  $\delta$  7.26 ppm; <sup>13</sup>C NMR: CDCl<sub>3</sub> at  $\delta$  77.00 ppm; <sup>11</sup>B NMR: BF<sub>3</sub>·Et<sub>2</sub>O at  $\delta$  0.0 ppm). Data for <sup>1</sup>H NMR were recorded as follows: chemical shift ( $\delta$ , ppm), multiplicity (s = singlet; d = doublet; t = triplet; m = multiplet; bs = broad singlet), coupling constant (*J* in Hz), integration. Mass spectra were collected at Bruker microTOF II ESI-TOF and Waters Micromass GCT Premier-TOF mass spectrometers. The UV-Vis and fluorescence spectra were collected on an Agilent 8354 and a Hitachi F-7000 spectrophotometer respectively. The X-ray single-crystal diffraction experiments were performed with a Bruker D8 VENTURE X-ray diffractometer with CMOS detector.

## II. Synthesis of 4-bromo-5-(1-naphthyl)-4a,8a-azaboranaphthalene (**4**)

4,5-dibromo-4a,8a-azaboranaphthalene **3b** (28.6 mg, 0.1 mmol), 1-naphthylboronic acid (34.4 mg, 0.2 mmol), K<sub>2</sub>CO<sub>3</sub> (27.7 mg, 0.2 mmol), and Pd(dppf)Cl<sub>2</sub> (3.6 mg, 0.005 mmol) were loaded in a Schlenk flask, which was then evacuated and recharged with nitrogen in three times. THF (3 mL) was injected with a syringe. The mixture was heated 12 hr at 110 °C. The solvent was removed by vacuum and the residue was extracted with CH<sub>2</sub>Cl<sub>2</sub>/H<sub>2</sub>O twice. The combined organic layers were washed with brine and dried with anhydrous MgSO<sub>4</sub>. The solution was concentrated and further purified by flash column chromatography (hexane:dichloromethane = 10:1). Product **4** was obtained as a light-yellow solid (37.3 mg, 56%).

<sup>1</sup>H NMR (400 MHz, CDCl<sub>3</sub>): δ 7.97-7.79 (m, 5H), 7.64-7.51 (m, 3H), 7.46 (t, *J* = 7.0 Hz, 1H), 7.32 (t, *J* = 6.3 Hz, 2H), 6.90 (t, *J* = 6.9 Hz, 1H), 6.59 (t, *J* = 7.1 Hz, 1H).

<sup>13</sup>C NMR (101 MHz, CDCl<sub>3</sub>): δ 143.2, 141.8, 140.2, 134.1, 133.8, 133.4, 126.7, 126.2, 125.4, 114.3, 113.9.

<sup>11</sup>B NMR (193 MHz, CDCl<sub>3</sub>): δ 26.99.

HRMS (EI<sup>+</sup>, 70 eV): calculated for C<sub>18</sub>H<sub>13</sub><sup>10</sup>BBrN [M]<sup>+</sup>: 332.0361; found: 332.0370.

## III. Synthesis of 3a-aza-9a-bora-perylene (**1**)

4-bromo-5-(1-naphthyl)-4a,8a-azaboranaphthalene (**4**) (33.4 mg, 0.1 mmol), LiCl (4.3 mg, 0.1 mmol), K<sub>2</sub>CO<sub>3</sub> (27.6 mg, 0.2 mmol), Pd(OAc)<sub>2</sub> (2.3 mg, 0.005 mmol), and Xantphos (5.8 mg, 0.01 mmol) were loaded in a Schlenk flask, which was then evacuated and recharged with nitrogen three times. 1,4-Dioxane (5 mL) was injected with a syringe. The mixture was heated for 12 hr at 130 °C. The solvent was removed by vacuum and the residue was extracted with CH<sub>2</sub>Cl<sub>2</sub>/H<sub>2</sub>O twice. The combined organic layers were washed with brine and dried with anhydrous MgSO<sub>4</sub>. The solution was concentrated and further purified by thin-layer column chromatography with hexane/CH<sub>2</sub>Cl<sub>2</sub> (1:1) as eluent. Product **1** was obtained as a light-yellow solid (12.6 mg, 50%). Single crystals of **1** suitable for X-ray diffraction were cultivated from its CH<sub>2</sub>Cl<sub>2</sub> solution.

<sup>1</sup>H NMR (400 MHz, CDCl<sub>3</sub>): δ 8.31 (d, *J* = 7.3 Hz, 2H), 8.24 (d, *J* = 6.9 Hz, 2H), 7.81 (d, *J* = 7.9 Hz, 2H), 7.75 (d, *J* = 7.9 Hz, 2H), 7.52 (t, *J* = 7.7 Hz, 2H), 6.87 (t, *J* = 6.8 Hz, 2H).

<sup>13</sup>C NMR (101 MHz, CDCl<sub>3</sub>): δ 135.6, 134.4, 131.1, 129.6, 128.9, 127.7, 125.7, 120.9, 115.4.

$^{11}\text{B}$  NMR (193 MHz,  $\text{CDCl}_3$ ):  $\delta$  29.00.

HRMS (EI+, 70 eV): calculated for  $\text{C}_{18}\text{H}_{12}^{10}\text{BN}$   $[\text{M}]^+$ : 252.1099; found: 252.1102.

#### IV. Synthesis of 3*a*,9*a*-diaz-3*a*<sup>I</sup>,6*a*<sup>I</sup>-dibora-perylene (2)

A mixture of 1,5-cyclooctadiene (COD, 540 mg, 5 mmol) and 2,2'-bipyridine (bpy, 390 mg, 2.5 mmol) in a Schlenk flask was dissolved in 30 mL of THF in the glovebox.  $\text{Ni}(\text{cod})_2$  (680 mg, 2.5 mmol) was added with magnetic stirring into the above colorless solution to afford a deep purple-blue solution, which was further stirred 5 min at room temperature. A solution of 4,5-dihalo-4*a*,8*a*-azaboranaphthalene (**3a**, 97 mg, 0.49 mmol; **3b**, 140 mg, 0.49 mmol) in 10 mL of THF was added into the above purple-blue solution. The sealed Schlenk flask was taken out of the glovebox and the reaction mixture was stirred for 12 hr at room temperature. The solvent was removed under vacuum and the residue was extracted with refluxing toluene (30 mL). After filtration and removal of toluene under vacuum, product **2** was isolated as a light-yellow solid (from **3a**: 39 mg, 63%; from **3b**: 62 mg, 100%). Single crystals of **2** suitable for X-ray diffraction were cultivated from its toluene solution.

$^1\text{H}$  NMR (400 MHz,  $\text{CDCl}_3$ ):  $\delta$  8.05 (d,  $J$  = 6.8 Hz, 4H), 7.59 (d,  $J$  = 6.8 Hz, 4H), 6.71 (t,  $J$  = 6.8 Hz, 4H).

$^{13}\text{C}$  NMR (101 MHz,  $\text{CDCl}_3$ ):  $\delta$  132.0, 127.9, 115.0.

$^{11}\text{B}$  NMR (193 MHz,  $\text{CDCl}_3$ ):  $\delta$  30.36.

HRMS (EI+, 70 eV): calculated for  $\text{C}_{16}\text{H}_{12}^{10}\text{B}_2\text{N}_2$   $[\text{M}]^+$ : 252.1259; found: 252.1252.

#### V. Determination of Structures of 1, 2, and 4

Single crystals of **1**, **2**, and **4** were immersed in FOMBLIN oil (HVAC 140/13, Sigma-Aldrich), mounted on a glass fiber, and examined on a Bruker D8 VENTURE diffractometer equipped with an Oxford Cryostream 800 low-temperature device using a nickel-filtered Cu  $\text{K}\alpha$  radiation source ( $\lambda$  = 1.54178 Å) and a Bruker PHOTON II detector at 150 K and 298 K, respectively. All data were integrated with SAINT and a multi-scan absorption correction using TWINABS was applied. The

structures were solved by direct methods using SHELXT and refined by full-matrix least-squares methods against  $F^2$  by SHELXL-2018/1. All non-hydrogen atoms were refined with anisotropic displacement parameters. The hydrogen atoms were refined their pivot atoms for terminal  $sp^3$  carbon atoms and 1.2 times for all other carbon atoms.

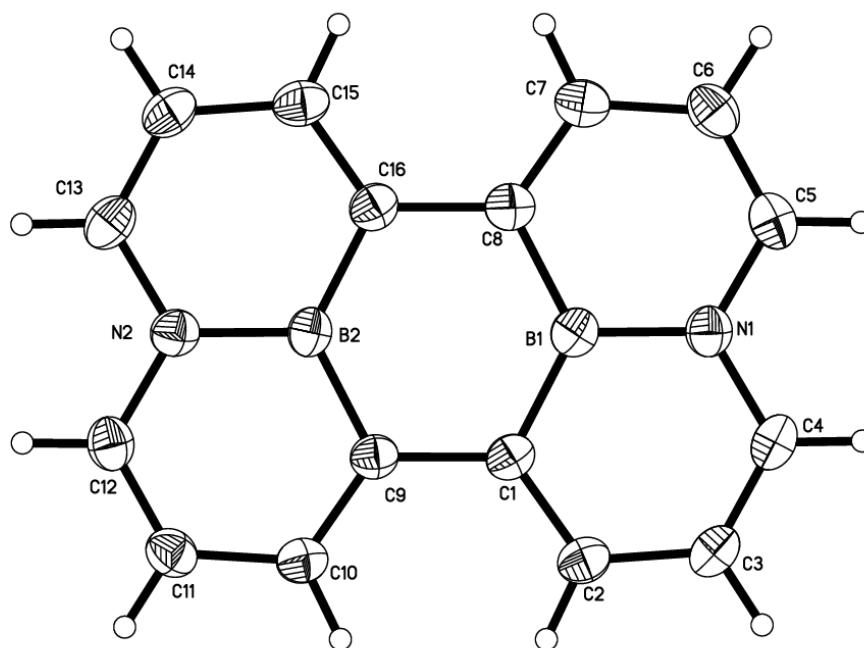

**Table S1. Crystallographic data for 2**

|                        |                                                               |
|------------------------|---------------------------------------------------------------|
| Identification code    | 191206b_a                                                     |
| CCDC Deposition Number | 2107103                                                       |
| Empirical formula      | C <sub>16</sub> H <sub>12</sub> B <sub>2</sub> N <sub>2</sub> |
| Formula weight         | 253.90                                                        |
| Temperature            | 154(2) K                                                      |
| Wavelength             | 1.54178 Å                                                     |
| Crystal system         | Monoclinic                                                    |
| Space group            | P2 <sub>1</sub> /c                                            |
| Unit cell dimensions   | a = 8.025(2) Å      α = 90 °                                  |

|                                        |                                                            |                             |
|----------------------------------------|------------------------------------------------------------|-----------------------------|
|                                        | $b = 11.722(3) \text{ \AA}$                                | $\beta = 100.484(19)^\circ$ |
|                                        | $c = 13.149(4) \text{ \AA}$                                | $\gamma = 90^\circ$         |
| Volume                                 | $1216.3(6) \text{ \AA}^3$                                  |                             |
| Z                                      | 4                                                          |                             |
| Density (calculated)                   | $1.386 \text{ Mg/m}^3$                                     |                             |
| Absorption coefficient                 | $0.617 \text{ mm}^{-1}$                                    |                             |
| F(000)                                 | 528                                                        |                             |
| Crystal size                           | $0.160 \times 0.080 \times 0.020 \text{ mm}^3$             |                             |
| Theta range for data collection        | $5.093 \text{ to } 66.593^\circ$                           |                             |
| Index ranges                           | $-9 \leq h \leq 7, -10 \leq k \leq 13, -14 \leq l \leq 15$ |                             |
| Reflections collected                  | 6537                                                       |                             |
| Independent reflections                | 2095 [R(int) = 0.0522]                                     |                             |
| Completeness to theta = $66.593^\circ$ | 97.8 %                                                     |                             |
| Absorption correction                  | Semi-empirical from equivalents                            |                             |
| Refinement method                      | Full-matrix least-squares on $F^2$                         |                             |
| Data / restraints / parameters         | 2095 / 0 / 181                                             |                             |
| Goodness-of-fit on $F^2$               | 1.101                                                      |                             |
| Final R indices [I > 2sigma(I)]        | $R1 = 0.0764, wR2 = 0.1811$                                |                             |
| R indices (all data)                   | $R1 = 0.1206, wR2 = 0.2023$                                |                             |
| Largest diff. peak and hole            | $0.185 \text{ and } -0.180 \text{ e.\AA}^{-3}$             |                             |

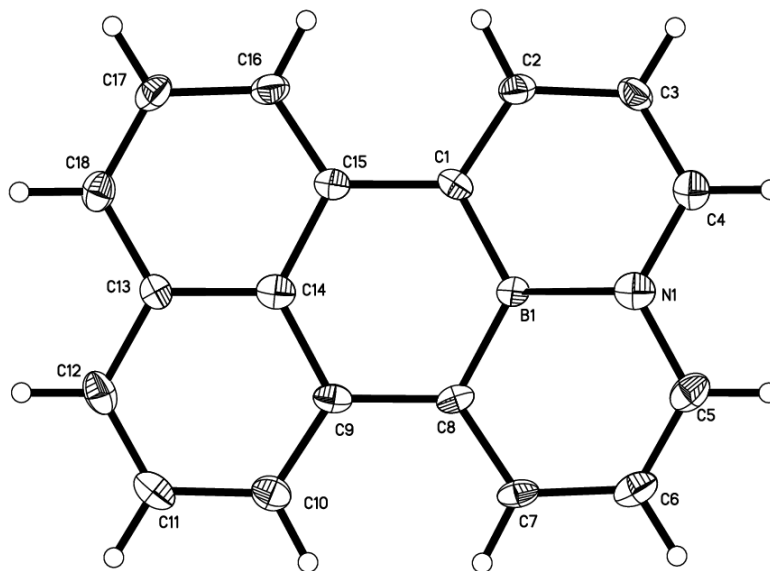

**Table S2. Crystallographic data for 1**

|                                   |                                             |                 |
|-----------------------------------|---------------------------------------------|-----------------|
| Identification code               | 191108c_a                                   |                 |
| CCDC Deposition Number            | 2107101                                     |                 |
| Empirical formula                 | C <sub>18</sub> H <sub>12</sub> B N         |                 |
| Formula weight                    | 253.10                                      |                 |
| Temperature                       | 150(2) K                                    |                 |
| Wavelength                        | 1.54178 Å                                   |                 |
| Crystal system                    | Monoclinic                                  |                 |
| Space group                       | P2 <sub>1</sub> /c                          |                 |
| Unit cell dimensions              | a = 10.0992(3) Å                            | α = 90 °        |
|                                   | b = 10.8731(4) Å                            | β = 98.743(2) ° |
|                                   | c = 11.1388(3) Å                            | γ = 90 °        |
| Volume                            | 1208.93(7) Å <sup>3</sup>                   |                 |
| Z                                 | 4                                           |                 |
| Density (calculated)              | 1.391 Mg/m <sup>3</sup>                     |                 |
| Absorption coefficient            | 0.609 mm <sup>-1</sup>                      |                 |
| F(000)                            | 528                                         |                 |
| Crystal size                      | 0.180 x 0.150 x 0.020 mm <sup>3</sup>       |                 |
| Theta range for data collection   | 4.429 to 66.535 °                           |                 |
| Index ranges                      | -11 ≤ h ≤ 11, -12 ≤ k ≤ 8, -13 ≤ l ≤ 10     |                 |
| Reflections collected             | 5175                                        |                 |
| Independent reflections           | 2098 [R(int) = 0.0357]                      |                 |
| Completeness to theta = 66.536 °  | 98.2 %                                      |                 |
| Absorption correction             | Semi-empirical from equivalents             |                 |
| Refinement method                 | Full-matrix least-squares on F <sup>2</sup> |                 |
| Data / restraints / parameters    | 2098 / 0 / 181                              |                 |
| Goodness-of-fit on F <sup>2</sup> | 1.064                                       |                 |
| Final R indices [I > 2σ(I)]       | R1 = 0.0490, wR2 = 0.1392                   |                 |
| R indices (all data)              | R1 = 0.0636, wR2 = 0.1507                   |                 |
| Largest diff. peak and hole       | 0.202 and -0.251 e.Å <sup>-3</sup>          |                 |

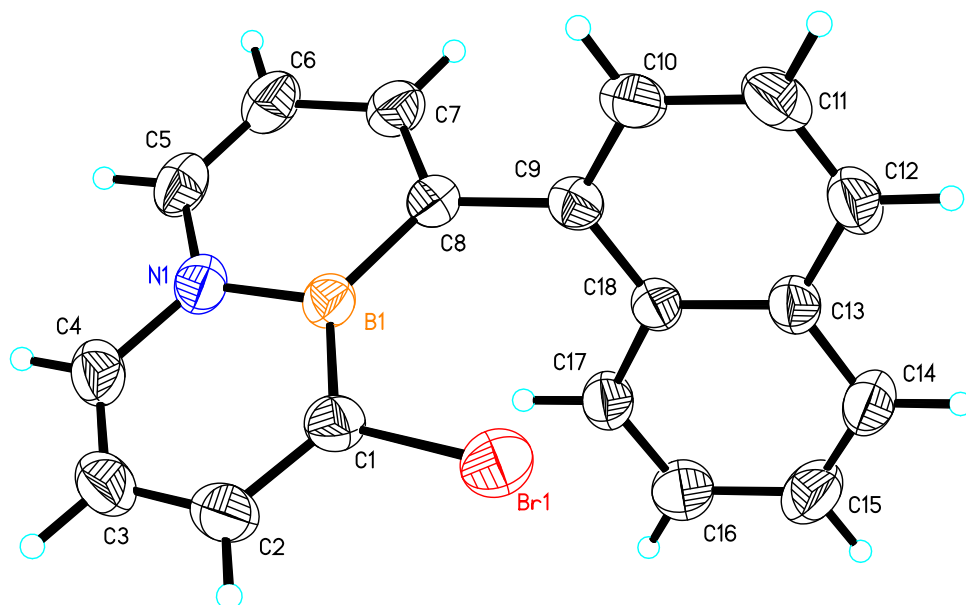

**Table S3. Crystallographic data for 4**

|                        |                                        |                 |
|------------------------|----------------------------------------|-----------------|
| Identification code    | 191021c_a                              |                 |
| CCDC Deposition Number | 2107102                                |                 |
| Empirical formula      | C <sub>18</sub> H <sub>13</sub> B Br N |                 |
| Formula weight         | 334.01                                 |                 |
| Temperature            | 298(2) K                               |                 |
| Wavelength             | 1.54178 Å                              |                 |
| Crystal system         | Triclinic                              |                 |
| Space group            | P-1                                    |                 |
| Unit cell dimensions   | a= 7.2364(4) Å                         | α= 108.647(2) ° |
|                        | b= 9.8678(5) Å                         | β= 91.793(3) °  |
|                        | c= 11.0736(6) Å                        | γ= 99.985(3) °  |
| Volume                 | 734.69(7) Å <sup>3</sup>               |                 |
| Z                      | 2                                      |                 |
| Density (calculated)   | 1.510 Mg/m <sup>3</sup>                |                 |
| Absorption coefficient | 3.713 mm <sup>-1</sup>                 |                 |
| F(000)                 | 336                                    |                 |
| Crystal size           | 0.250 x 0.130 x 0.050 mm <sup>3</sup>  |                 |



|                                   |                                             |
|-----------------------------------|---------------------------------------------|
| Theta range for data collection   | 4.232 to 68.172 °                           |
| Index ranges                      | -8<=h<=8, -11<=k<=11, -11<=l<=13            |
| Reflections collected             | 6463                                        |
| Independent reflections           | 2654 [R(int) = 0.0422]                      |
| Completeness to theta = 67.679 °  | 98.7 %                                      |
| Absorption correction             | Semi-empirical from equivalents             |
| Refinement method                 | Full-matrix least-squares on F <sup>2</sup> |
| Data / restraints / parameters    | 2654 / 0 / 190                              |
| Goodness-of-fit on F <sup>2</sup> | 1.047                                       |
| Final R indices [I>2sigma(I)]     | R1 = 0.0478, wR2 = 0.1286                   |
| R indices (all data)              | R1 = 0.0517, wR2 = 0.1344                   |
| Largest diff. peak and hole       | 0.844 and -0.733 e.Å <sup>-3</sup>          |

---

## VI. Density Function Theory (DFT) Calculations

Density functional theory (DFT) calculations were carried out with Gaussian 09 software package.<sup>1,2</sup> The geometry optimization and frequency calculations were carried out at M062X/6-31G+(d) level.<sup>3</sup>

Perylene

File Name = Perylene

File Type = .log

Calculation Type = FOPT

Calculation Method = RM062X

Basis Set = 6-31+G(d)

Charge = 0

Spin = Singlet

E(RM062X) = -769.10449636 a.u.

RMS Gradient Norm = 0.00009880 a.u.

Imaginary Freq =

Dipole Moment = 0.0001 Debye

Point Group = C1

Job CPU time: 0 days 1 hours 40 minutes 54.9 seconds.

\*\*\*\*\*

|         |         |         |   |   |   |   |   |   |   |   |   |   |   |   |   |
|---------|---------|---------|---|---|---|---|---|---|---|---|---|---|---|---|---|
| 1.3500  | 0.2700  | 0.5934  | C | 0 | 0 | 0 | 0 | 0 | 0 | 0 | 0 | 0 | 0 | 0 | 0 |
| 2.6080  | 0.4642  | 1.1371  | C | 0 | 0 | 0 | 0 | 0 | 0 | 0 | 0 | 0 | 0 | 0 | 0 |
| 2.8968  | 1.5622  | 1.9710  | C | 0 | 0 | 0 | 0 | 0 | 0 | 0 | 0 | 0 | 0 | 0 | 0 |
| 1.9209  | 2.4785  | 2.2674  | C | 0 | 0 | 0 | 0 | 0 | 0 | 0 | 0 | 0 | 0 | 0 | 0 |
| -0.3997 | 3.2710  | 2.0381  | C | 0 | 0 | 0 | 0 | 0 | 0 | 0 | 0 | 0 | 0 | 0 | 0 |
| -1.6607 | 3.1173  | 1.5221  | C | 0 | 0 | 0 | 0 | 0 | 0 | 0 | 0 | 0 | 0 | 0 | 0 |
| -1.9561 | 2.0209  | 0.6882  | C | 0 | 0 | 0 | 0 | 0 | 0 | 0 | 0 | 0 | 0 | 0 | 0 |
| -1.0027 | 1.0726  | 0.3615  | C | 0 | 0 | 0 | 0 | 0 | 0 | 0 | 0 | 0 | 0 | 0 | 0 |
| 1.0426  | -0.8818 | -0.2833 | C | 0 | 0 | 0 | 0 | 0 | 0 | 0 | 0 | 0 | 0 | 0 | 0 |
| 1.9959  | -1.8302 | -0.6097 | C | 0 | 0 | 0 | 0 | 0 | 0 | 0 | 0 | 0 | 0 | 0 | 0 |
| 1.7005  | -2.9266 | -1.4436 | C | 0 | 0 | 0 | 0 | 0 | 0 | 0 | 0 | 0 | 0 | 0 | 0 |
| 0.4396  | -3.0802 | -1.9597 | C | 0 | 0 | 0 | 0 | 0 | 0 | 0 | 0 | 0 | 0 | 0 | 0 |
| -1.8810 | -2.2875 | -2.1893 | C | 0 | 0 | 0 | 0 | 0 | 0 | 0 | 0 | 0 | 0 | 0 | 0 |
| -2.8568 | -1.3711 | -1.8930 | C | 0 | 0 | 0 | 0 | 0 | 0 | 0 | 0 | 0 | 0 | 0 | 0 |
| -2.5680 | -0.2732 | -1.0591 | C | 0 | 0 | 0 | 0 | 0 | 0 | 0 | 0 | 0 | 0 | 0 | 0 |
| -1.3100 | -0.0790 | -0.5153 | C | 0 | 0 | 0 | 0 | 0 | 0 | 0 | 0 | 0 | 0 | 0 | 0 |
| 3.4093  | -0.2358 | 0.9300  | H | 0 | 0 | 0 | 0 | 0 | 0 | 0 | 0 | 0 | 0 | 0 | 0 |
| 3.8984  | 1.6737  | 2.3754  | H | 0 | 0 | 0 | 0 | 0 | 0 | 0 | 0 | 0 | 0 | 0 | 0 |
| 2.1305  | 3.3303  | 2.9093  | H | 0 | 0 | 0 | 0 | 0 | 0 | 0 | 0 | 0 | 0 | 0 | 0 |
| -0.1570 | 4.1127  | 2.6817  | H | 0 | 0 | 0 | 0 | 0 | 0 | 0 | 0 | 0 | 0 | 0 | 0 |
| -2.4412 | 3.8374  | 1.7493  | H | 0 | 0 | 0 | 0 | 0 | 0 | 0 | 0 | 0 | 0 | 0 | 0 |
| -2.9657 | 1.9387  | 0.3026  | H | 0 | 0 | 0 | 0 | 0 | 0 | 0 | 0 | 0 | 0 | 0 | 0 |
| 3.0055  | -1.7480 | -0.2240 | H | 0 | 0 | 0 | 0 | 0 | 0 | 0 | 0 | 0 | 0 | 0 | 0 |

|         |         |         |   |   |   |   |   |   |   |   |   |   |   |   |   |
|---------|---------|---------|---|---|---|---|---|---|---|---|---|---|---|---|---|
| 2.4810  | -3.6468 | -1.6707 | H | 0 | 0 | 0 | 0 | 0 | 0 | 0 | 0 | 0 | 0 | 0 | 0 |
| 0.1969  | -3.9220 | -2.6033 | H | 0 | 0 | 0 | 0 | 0 | 0 | 0 | 0 | 0 | 0 | 0 | 0 |
| -2.0906 | -3.1394 | -2.8312 | H | 0 | 0 | 0 | 0 | 0 | 0 | 0 | 0 | 0 | 0 | 0 | 0 |
| -3.8584 | -1.4826 | -2.2975 | H | 0 | 0 | 0 | 0 | 0 | 0 | 0 | 0 | 0 | 0 | 0 | 0 |
| -3.3693 | 0.4269  | -0.8521 | H | 0 | 0 | 0 | 0 | 0 | 0 | 0 | 0 | 0 | 0 | 0 | 0 |
| 0.6146  | 2.3270  | 1.7364  | C | 0 | 0 | 0 | 0 | 0 | 0 | 0 | 0 | 0 | 0 | 0 | 0 |
| 0.3188  | 1.2161  | 0.8919  | C | 0 | 0 | 0 | 0 | 0 | 0 | 0 | 0 | 0 | 0 | 0 | 0 |
| -0.2788 | -1.0252 | -0.8138 | C | 0 | 0 | 0 | 0 | 0 | 0 | 0 | 0 | 0 | 0 | 0 | 0 |
| -0.5747 | -2.1361 | -1.6581 | C | 0 | 0 | 0 | 0 | 0 | 0 | 0 | 0 | 0 | 0 | 0 | 0 |

BN-Perylene

File Name = BN-Perylene

File Type = .log

Calculation Type = FOPT

Calculation Method = RM062X

Basis Set = 6-31+G(d)

Charge = 0

Spin = Singlet

E(RM062X) = -772.52114551 a.u.

RMS Gradient Norm = 0.00004385 a.u.

Imaginary Freq =

Dipole Moment = 1.7306 Debye

Point Group = C1

Job CPU time: 0 days 1 hours 36 minutes 35.3 seconds.

\*\*\*\*\*

|        |         |         |   |   |   |   |   |   |   |   |   |   |   |   |   |
|--------|---------|---------|---|---|---|---|---|---|---|---|---|---|---|---|---|
| 2.8961 | 0.0000  | 0.0000  | N | 0 | 0 | 0 | 0 | 0 | 0 | 0 | 0 | 0 | 0 | 0 | 0 |
| 0.7113 | -1.3240 | -0.0000 | C | 0 | 0 | 0 | 0 | 0 | 0 | 0 | 0 | 0 | 0 | 0 | 0 |
| 1.4779 | -2.4641 | -0.0001 | C | 0 | 0 | 0 | 0 | 0 | 0 | 0 | 0 | 0 | 0 | 0 | 0 |

|         |         |         |   |   |   |   |   |   |   |   |   |   |   |   |   |
|---------|---------|---------|---|---|---|---|---|---|---|---|---|---|---|---|---|
| 2.9053  | -2.3868 | -0.0001 | C | 0 | 0 | 0 | 0 | 0 | 0 | 0 | 0 | 0 | 0 | 0 | 0 |
| 3.5748  | -1.2002 | -0.0000 | C | 0 | 0 | 0 | 0 | 0 | 0 | 0 | 0 | 0 | 0 | 0 | 0 |
| 3.5748  | 1.2002  | 0.0000  | C | 0 | 0 | 0 | 0 | 0 | 0 | 0 | 0 | 0 | 0 | 0 | 0 |
| 2.9053  | 2.3868  | 0.0001  | C | 0 | 0 | 0 | 0 | 0 | 0 | 0 | 0 | 0 | 0 | 0 | 0 |
| 1.4779  | 2.4641  | 0.0000  | C | 0 | 0 | 0 | 0 | 0 | 0 | 0 | 0 | 0 | 0 | 0 | 0 |
| 0.7113  | 1.3240  | 0.0000  | C | 0 | 0 | 0 | 0 | 0 | 0 | 0 | 0 | 0 | 0 | 0 | 0 |
| -0.7656 | -1.2749 | 0.0000  | C | 0 | 0 | 0 | 0 | 0 | 0 | 0 | 0 | 0 | 0 | 0 | 0 |
| -1.5193 | -2.4359 | 0.0001  | C | 0 | 0 | 0 | 0 | 0 | 0 | 0 | 0 | 0 | 0 | 0 | 0 |
| -2.9270 | -2.4223 | 0.0001  | C | 0 | 0 | 0 | 0 | 0 | 0 | 0 | 0 | 0 | 0 | 0 | 0 |
| -3.5925 | -1.2242 | 0.0000  | C | 0 | 0 | 0 | 0 | 0 | 0 | 0 | 0 | 0 | 0 | 0 | 0 |
| -3.5925 | 1.2242  | -0.0000 | C | 0 | 0 | 0 | 0 | 0 | 0 | 0 | 0 | 0 | 0 | 0 | 0 |
| -2.9270 | 2.4223  | -0.0001 | C | 0 | 0 | 0 | 0 | 0 | 0 | 0 | 0 | 0 | 0 | 0 | 0 |
| -1.5193 | 2.4359  | -0.0000 | C | 0 | 0 | 0 | 0 | 0 | 0 | 0 | 0 | 0 | 0 | 0 | 0 |
| -0.7656 | 1.2749  | -0.0000 | C | 0 | 0 | 0 | 0 | 0 | 0 | 0 | 0 | 0 | 0 | 0 | 0 |
| 1.4439  | 0.0000  | 0.0000  | B | 0 | 0 | 0 | 0 | 0 | 0 | 0 | 0 | 0 | 0 | 0 | 0 |
| 1.0427  | -3.4622 | -0.0001 | H | 0 | 0 | 0 | 0 | 0 | 0 | 0 | 0 | 0 | 0 | 0 | 0 |
| 3.4897  | -3.3009 | -0.0001 | H | 0 | 0 | 0 | 0 | 0 | 0 | 0 | 0 | 0 | 0 | 0 | 0 |
| 4.6595  | -1.1419 | -0.0000 | H | 0 | 0 | 0 | 0 | 0 | 0 | 0 | 0 | 0 | 0 | 0 | 0 |
| 4.6595  | 1.1419  | 0.0000  | H | 0 | 0 | 0 | 0 | 0 | 0 | 0 | 0 | 0 | 0 | 0 | 0 |
| 3.4897  | 3.3009  | 0.0001  | H | 0 | 0 | 0 | 0 | 0 | 0 | 0 | 0 | 0 | 0 | 0 | 0 |
| 1.0427  | 3.4622  | 0.0001  | H | 0 | 0 | 0 | 0 | 0 | 0 | 0 | 0 | 0 | 0 | 0 | 0 |
| -1.0147 | -3.3973 | 0.0001  | H | 0 | 0 | 0 | 0 | 0 | 0 | 0 | 0 | 0 | 0 | 0 | 0 |
| -3.4749 | -3.3601 | 0.0001  | H | 0 | 0 | 0 | 0 | 0 | 0 | 0 | 0 | 0 | 0 | 0 | 0 |
| -4.6792 | -1.1893 | 0.0000  | H | 0 | 0 | 0 | 0 | 0 | 0 | 0 | 0 | 0 | 0 | 0 | 0 |
| -4.6792 | 1.1893  | -0.0000 | H | 0 | 0 | 0 | 0 | 0 | 0 | 0 | 0 | 0 | 0 | 0 | 0 |
| -3.4749 | 3.3601  | -0.0001 | H | 0 | 0 | 0 | 0 | 0 | 0 | 0 | 0 | 0 | 0 | 0 | 0 |
| -1.0147 | 3.3973  | -0.0001 | H | 0 | 0 | 0 | 0 | 0 | 0 | 0 | 0 | 0 | 0 | 0 | 0 |
| -1.4453 | 0.0000  | -0.0000 | C | 0 | 0 | 0 | 0 | 0 | 0 | 0 | 0 | 0 | 0 | 0 | 0 |

-2.8741 -0.0000 -0.0000 C 0 0 0 0 0 0 0 0 0 0 0 0 0 0

2BN-Perylene

File Name = 2BN-Perylene

File Type = .log

Calculation Type = FOPT

Calculation Method = RM062X

Basis Set = 6-31+G(d)

Charge = 0

Spin = Singlet

E(RM062X) = -775.94109280 a.u.

RMS Gradient Norm = 0.00008262 a.u.

Imaginary Freq =

Dipole Moment = 0.0000 Debye

Point Group = C1

Job CPU time: 0 days 1 hours 11 minutes 2.5 seconds.

\*\*\*\*\*

|         |         |         |   |   |   |   |   |   |   |   |   |   |   |   |   |
|---------|---------|---------|---|---|---|---|---|---|---|---|---|---|---|---|---|
| 0.6224  | 2.3565  | 1.7604  | N | 0 | 0 | 0 | 0 | 0 | 0 | 0 | 0 | 0 | 0 | 0 | 0 |
| -0.5824 | -2.1657 | -1.6821 | N | 0 | 0 | 0 | 0 | 0 | 0 | 0 | 0 | 0 | 0 | 0 | 0 |
| 1.4533  | 0.2353  | 0.6027  | C | 0 | 0 | 0 | 0 | 0 | 0 | 0 | 0 | 0 | 0 | 0 | 0 |
| 2.6766  | 0.4870  | 1.1713  | C | 0 | 0 | 0 | 0 | 0 | 0 | 0 | 0 | 0 | 0 | 0 | 0 |
| 2.8858  | 1.6259  | 2.0101  | C | 0 | 0 | 0 | 0 | 0 | 0 | 0 | 0 | 0 | 0 | 0 | 0 |
| 1.8913  | 2.5128  | 2.2839  | C | 0 | 0 | 0 | 0 | 0 | 0 | 0 | 0 | 0 | 0 | 0 | 0 |
| -0.3582 | 3.2827  | 2.0590  | C | 0 | 0 | 0 | 0 | 0 | 0 | 0 | 0 | 0 | 0 | 0 | 0 |
| -1.6200 | 3.1647  | 1.5647  | C | 0 | 0 | 0 | 0 | 0 | 0 | 0 | 0 | 0 | 0 | 0 | 0 |
| -2.0032 | 2.0820  | 0.7125  | C | 0 | 0 | 0 | 0 | 0 | 0 | 0 | 0 | 0 | 0 | 0 | 0 |
| -1.1068 | 1.1075  | 0.3518  | C | 0 | 0 | 0 | 0 | 0 | 0 | 0 | 0 | 0 | 0 | 0 | 0 |
| 1.1467  | -0.9166 | -0.2735 | C | 0 | 0 | 0 | 0 | 0 | 0 | 0 | 0 | 0 | 0 | 0 | 0 |

|         |         |         |   |   |   |   |   |   |   |   |   |   |   |   |   |   |
|---------|---------|---------|---|---|---|---|---|---|---|---|---|---|---|---|---|---|
| 2.0431  | -1.8912 | -0.6342 | C | 0 | 0 | 0 | 0 | 0 | 0 | 0 | 0 | 0 | 0 | 0 | 0 | 0 |
| 1.6598  | -2.9739 | -1.4864 | C | 0 | 0 | 0 | 0 | 0 | 0 | 0 | 0 | 0 | 0 | 0 | 0 | 0 |
| 0.3981  | -3.0918 | -1.9807 | C | 0 | 0 | 0 | 0 | 0 | 0 | 0 | 0 | 0 | 0 | 0 | 0 | 0 |
| -1.8513 | -2.3219 | -2.2057 | C | 0 | 0 | 0 | 0 | 0 | 0 | 0 | 0 | 0 | 0 | 0 | 0 | 0 |
| -2.8458 | -1.4349 | -1.9319 | C | 0 | 0 | 0 | 0 | 0 | 0 | 0 | 0 | 0 | 0 | 0 | 0 | 0 |
| -2.6366 | -0.2961 | -1.0932 | C | 0 | 0 | 0 | 0 | 0 | 0 | 0 | 0 | 0 | 0 | 0 | 0 | 0 |
| -1.4133 | -0.0444 | -0.5244 | C | 0 | 0 | 0 | 0 | 0 | 0 | 0 | 0 | 0 | 0 | 0 | 0 | 0 |
| 0.3199  | 1.2223  | 0.8971  | B | 0 | 0 | 0 | 0 | 0 | 0 | 0 | 0 | 0 | 0 | 0 | 0 | 0 |
| -0.2800 | -1.0314 | -0.8188 | B | 0 | 0 | 0 | 0 | 0 | 0 | 0 | 0 | 0 | 0 | 0 | 0 | 0 |
| 3.5307  | -0.1693 | 1.0060  | H | 0 | 0 | 0 | 0 | 0 | 0 | 0 | 0 | 0 | 0 | 0 | 0 | 0 |
| 3.8628  | 1.7995  | 2.4490  | H | 0 | 0 | 0 | 0 | 0 | 0 | 0 | 0 | 0 | 0 | 0 | 0 | 0 |
| 2.0433  | 3.3800  | 2.9205  | H | 0 | 0 | 0 | 0 | 0 | 0 | 0 | 0 | 0 | 0 | 0 | 0 | 0 |
| -0.0608 | 4.1033  | 2.7058  | H | 0 | 0 | 0 | 0 | 0 | 0 | 0 | 0 | 0 | 0 | 0 | 0 | 0 |
| -2.3482 | 3.9230  | 1.8334  | H | 0 | 0 | 0 | 0 | 0 | 0 | 0 | 0 | 0 | 0 | 0 | 0 | 0 |
| -3.0358 | 2.0687  | 0.3645  | H | 0 | 0 | 0 | 0 | 0 | 0 | 0 | 0 | 0 | 0 | 0 | 0 | 0 |
| 3.0757  | -1.8779 | -0.2861 | H | 0 | 0 | 0 | 0 | 0 | 0 | 0 | 0 | 0 | 0 | 0 | 0 | 0 |
| 2.3880  | -3.7322 | -1.7550 | H | 0 | 0 | 0 | 0 | 0 | 0 | 0 | 0 | 0 | 0 | 0 | 0 | 0 |
| 0.1007  | -3.9124 | -2.6275 | H | 0 | 0 | 0 | 0 | 0 | 0 | 0 | 0 | 0 | 0 | 0 | 0 | 0 |
| -2.0034 | -3.1891 | -2.8423 | H | 0 | 0 | 0 | 0 | 0 | 0 | 0 | 0 | 0 | 0 | 0 | 0 | 0 |
| -3.8228 | -1.6085 | -2.3709 | H | 0 | 0 | 0 | 0 | 0 | 0 | 0 | 0 | 0 | 0 | 0 | 0 | 0 |
| -3.4907 | 0.3603  | -0.9279 | H | 0 | 0 | 0 | 0 | 0 | 0 | 0 | 0 | 0 | 0 | 0 | 0 | 0 |

Perylene-D

File Name = Perylene-D

File Type = .log

Calculation Type = FOPT

Calculation Method = RM062X

Basis Set = 6-31+G(d)

Charge = 0

Spin = Singlet

E(RM062X) = -1538.23696969 a.u.

RMS Gradient Norm = 0.00003060 a.u.

Imaginary Freq =

Dipole Moment = 0.0010 Debye

Point Group = C1

Job CPU time: 7 days 6 hours 20 minutes 19.1 seconds.

\*\*\*\*\*

|         |         |         |   |   |   |   |   |   |   |   |   |   |   |   |   |   |
|---------|---------|---------|---|---|---|---|---|---|---|---|---|---|---|---|---|---|
| 0.9323  | -0.0062 | 0.4442  | C | 0 | 0 | 0 | 0 | 0 | 0 | 0 | 0 | 0 | 0 | 0 | 0 | 0 |
| 2.1396  | 0.0523  | 1.1183  | C | 0 | 0 | 0 | 0 | 0 | 0 | 0 | 0 | 0 | 0 | 0 | 0 | 0 |
| 2.4289  | 1.0831  | 2.0335  | C | 0 | 0 | 0 | 0 | 0 | 0 | 0 | 0 | 0 | 0 | 0 | 0 | 0 |
| 1.5043  | 2.0632  | 2.2868  | C | 0 | 0 | 0 | 0 | 0 | 0 | 0 | 0 | 0 | 0 | 0 | 0 | 0 |
| -0.7214 | 3.0426  | 1.9012  | C | 0 | 0 | 0 | 0 | 0 | 0 | 0 | 0 | 0 | 0 | 0 | 0 | 0 |
| -1.9392 | 3.0107  | 1.2707  | C | 0 | 0 | 0 | 0 | 0 | 0 | 0 | 0 | 0 | 0 | 0 | 0 | 0 |
| -2.2311 | 1.9904  | 0.3442  | C | 0 | 0 | 0 | 0 | 0 | 0 | 0 | 0 | 0 | 0 | 0 | 0 | 0 |
| -1.3184 | 0.9949  | 0.0409  | C | 0 | 0 | 0 | 0 | 0 | 0 | 0 | 0 | 0 | 0 | 0 | 0 | 0 |
| 0.6241  | -1.0831 | -0.5220 | C | 0 | 0 | 0 | 0 | 0 | 0 | 0 | 0 | 0 | 0 | 0 | 0 | 0 |
| 1.5241  | -2.0963 | -0.8032 | C | 0 | 0 | 0 | 0 | 0 | 0 | 0 | 0 | 0 | 0 | 0 | 0 | 0 |
| 1.2336  | -3.1172 | -1.7290 | C | 0 | 0 | 0 | 0 | 0 | 0 | 0 | 0 | 0 | 0 | 0 | 0 | 0 |
| 0.0304  | -3.1280 | -2.3861 | C | 0 | 0 | 0 | 0 | 0 | 0 | 0 | 0 | 0 | 0 | 0 | 0 | 0 |
| -2.1813 | -2.1297 | -2.7987 | C | 0 | 0 | 0 | 0 | 0 | 0 | 0 | 0 | 0 | 0 | 0 | 0 | 0 |
| -3.1186 | -1.1668 | -2.5268 | C | 0 | 0 | 0 | 0 | 0 | 0 | 0 | 0 | 0 | 0 | 0 | 0 | 0 |
| -2.8394 | -0.1521 | -1.5893 | C | 0 | 0 | 0 | 0 | 0 | 0 | 0 | 0 | 0 | 0 | 0 | 0 | 0 |
| -1.6256 | -0.0826 | -0.9260 | C | 0 | 0 | 0 | 0 | 0 | 0 | 0 | 0 | 0 | 0 | 0 | 0 | 0 |
| 2.8927  | -0.7126 | 0.9656  | H | 0 | 0 | 0 | 0 | 0 | 0 | 0 | 0 | 0 | 0 | 0 | 0 | 0 |
| 3.3881  | 1.0850  | 2.5440  | H | 0 | 0 | 0 | 0 | 0 | 0 | 0 | 0 | 0 | 0 | 0 | 0 | 0 |
| 1.7145  | 2.8620  | 2.9941  | H | 0 | 0 | 0 | 0 | 0 | 0 | 0 | 0 | 0 | 0 | 0 | 0 | 0 |

|         |         |           |   |   |   |   |   |   |   |   |   |   |   |   |   |
|---------|---------|-----------|---|---|---|---|---|---|---|---|---|---|---|---|---|
| -0.4816 | 3.8262  | 2.6161 H  | 0 | 0 | 0 | 0 | 0 | 0 | 0 | 0 | 0 | 0 | 0 | 0 | 0 |
| -2.6858 | 3.7728  | 1.4758 H  | 0 | 0 | 0 | 0 | 0 | 0 | 0 | 0 | 0 | 0 | 0 | 0 | 0 |
| -3.2048 | 2.0063  | -0.1325 H | 0 | 0 | 0 | 0 | 0 | 0 | 0 | 0 | 0 | 0 | 0 | 0 | 0 |
| 2.4812  | -2.1353 | -0.2941 H | 0 | 0 | 0 | 0 | 0 | 0 | 0 | 0 | 0 | 0 | 0 | 0 | 0 |
| 1.9625  | -3.9041 | -1.9002 H | 0 | 0 | 0 | 0 | 0 | 0 | 0 | 0 | 0 | 0 | 0 | 0 | 0 |
| -0.2133 | -3.9174 | -3.0934 H | 0 | 0 | 0 | 0 | 0 | 0 | 0 | 0 | 0 | 0 | 0 | 0 | 0 |
| -2.3847 | -2.9233 | -3.5136 H | 0 | 0 | 0 | 0 | 0 | 0 | 0 | 0 | 0 | 0 | 0 | 0 | 0 |
| -4.0816 | -1.1763 | -3.0298 H | 0 | 0 | 0 | 0 | 0 | 0 | 0 | 0 | 0 | 0 | 0 | 0 | 0 |
| -3.6074 | 0.5918  | -1.4077 H | 0 | 0 | 0 | 0 | 0 | 0 | 0 | 0 | 0 | 0 | 0 | 0 | 0 |
| 0.6698  | -3.1986 | 2.3694 C  | 0 | 0 | 0 | 0 | 0 | 0 | 0 | 0 | 0 | 0 | 0 | 0 | 0 |
| 1.8836  | -3.1291 | 3.0330 C  | 0 | 0 | 0 | 0 | 0 | 0 | 0 | 0 | 0 | 0 | 0 | 0 | 0 |
| 2.1625  | -2.1145 | 3.9706 C  | 0 | 0 | 0 | 0 | 0 | 0 | 0 | 0 | 0 | 0 | 0 | 0 | 0 |
| 1.2252  | -1.1515 | 4.2423 C  | 0 | 0 | 0 | 0 | 0 | 0 | 0 | 0 | 0 | 0 | 0 | 0 | 0 |
| -0.9865 | -0.1533 | 3.8295 C  | 0 | 0 | 0 | 0 | 0 | 0 | 0 | 0 | 0 | 0 | 0 | 0 | 0 |
| -2.1896 | -0.1640 | 3.1721 C  | 0 | 0 | 0 | 0 | 0 | 0 | 0 | 0 | 0 | 0 | 0 | 0 | 0 |
| -2.4798 | -1.1848 | 2.2460 C  | 0 | 0 | 0 | 0 | 0 | 0 | 0 | 0 | 0 | 0 | 0 | 0 | 0 |
| -1.5799 | -2.1982 | 1.9652 C  | 0 | 0 | 0 | 0 | 0 | 0 | 0 | 0 | 0 | 0 | 0 | 0 | 0 |
| 0.3630  | -4.2760 | 1.4024 C  | 0 | 0 | 0 | 0 | 0 | 0 | 0 | 0 | 0 | 0 | 0 | 0 | 0 |
| 1.2758  | -5.2713 | 1.0990 C  | 0 | 0 | 0 | 0 | 0 | 0 | 0 | 0 | 0 | 0 | 0 | 0 | 0 |
| 0.9843  | -6.2913 | 0.1721 C  | 0 | 0 | 0 | 0 | 0 | 0 | 0 | 0 | 0 | 0 | 0 | 0 | 0 |
| -0.2336 | -6.3234 | -0.4584 C | 0 | 0 | 0 | 0 | 0 | 0 | 0 | 0 | 0 | 0 | 0 | 0 | 0 |
| -2.4597 | -5.3448 | -0.8434 C | 0 | 0 | 0 | 0 | 0 | 0 | 0 | 0 | 0 | 0 | 0 | 0 | 0 |
| -3.3846 | -4.3651 | -0.5897 C | 0 | 0 | 0 | 0 | 0 | 0 | 0 | 0 | 0 | 0 | 0 | 0 | 0 |
| -3.0955 | -3.3343 | 0.3255 C  | 0 | 0 | 0 | 0 | 0 | 0 | 0 | 0 | 0 | 0 | 0 | 0 | 0 |
| -1.8880 | -3.2753 | 0.9992 C  | 0 | 0 | 0 | 0 | 0 | 0 | 0 | 0 | 0 | 0 | 0 | 0 | 0 |
| 2.6516  | -3.8730 | 2.8514 H  | 0 | 0 | 0 | 0 | 0 | 0 | 0 | 0 | 0 | 0 | 0 | 0 | 0 |
| 3.1255  | -2.1049 | 4.4736 H  | 0 | 0 | 0 | 0 | 0 | 0 | 0 | 0 | 0 | 0 | 0 | 0 | 0 |
| 1.4285  | -0.3580 | 4.9572 H  | 0 | 0 | 0 | 0 | 0 | 0 | 0 | 0 | 0 | 0 | 0 | 0 | 0 |



|         |         |         |   |   |   |   |   |   |   |   |   |   |   |   |   |
|---------|---------|---------|---|---|---|---|---|---|---|---|---|---|---|---|---|
| -0.7431 | 0.6356  | 4.5374  | H | 0 | 0 | 0 | 0 | 0 | 0 | 0 | 0 | 0 | 0 | 0 | 0 |
| -2.9185 | 0.6228  | 3.3434  | H | 0 | 0 | 0 | 0 | 0 | 0 | 0 | 0 | 0 | 0 | 0 | 0 |
| -3.4366 | -1.1456 | 1.7366  | H | 0 | 0 | 0 | 0 | 0 | 0 | 0 | 0 | 0 | 0 | 0 | 0 |
| 2.2495  | -5.2871 | 1.5759  | H | 0 | 0 | 0 | 0 | 0 | 0 | 0 | 0 | 0 | 0 | 0 | 0 |
| 1.7311  | -7.0531 | -0.0332 | H | 0 | 0 | 0 | 0 | 0 | 0 | 0 | 0 | 0 | 0 | 0 | 0 |
| -0.4731 | -7.1069 | -1.1735 | H | 0 | 0 | 0 | 0 | 0 | 0 | 0 | 0 | 0 | 0 | 0 | 0 |
| -2.6697 | -6.1436 | -1.5508 | H | 0 | 0 | 0 | 0 | 0 | 0 | 0 | 0 | 0 | 0 | 0 | 0 |
| -4.3439 | -4.3674 | -1.1000 | H | 0 | 0 | 0 | 0 | 0 | 0 | 0 | 0 | 0 | 0 | 0 | 0 |
| -3.8489 | -2.5698 | 0.4786  | H | 0 | 0 | 0 | 0 | 0 | 0 | 0 | 0 | 0 | 0 | 0 | 0 |
| 0.2482  | 2.0451  | 1.6288  | C | 0 | 0 | 0 | 0 | 0 | 0 | 0 | 0 | 0 | 0 | 0 | 0 |
| -0.0465 | 1.0071  | 0.6957  | C | 0 | 0 | 0 | 0 | 0 | 0 | 0 | 0 | 0 | 0 | 0 | 0 |
| -0.0256 | -1.1643 | 3.5758  | C | 0 | 0 | 0 | 0 | 0 | 0 | 0 | 0 | 0 | 0 | 0 | 0 |
| -0.3157 | -2.1970 | 2.6352  | C | 0 | 0 | 0 | 0 | 0 | 0 | 0 | 0 | 0 | 0 | 0 | 0 |
| -0.6401 | -1.0843 | -1.1918 | C | 0 | 0 | 0 | 0 | 0 | 0 | 0 | 0 | 0 | 0 | 0 | 0 |
| -0.9304 | -2.1170 | -2.1324 | C | 0 | 0 | 0 | 0 | 0 | 0 | 0 | 0 | 0 | 0 | 0 | 0 |
| -0.9090 | -4.2883 | 0.7475  | C | 0 | 0 | 0 | 0 | 0 | 0 | 0 | 0 | 0 | 0 | 0 | 0 |
| -1.2035 | -5.3264 | -0.1856 | C | 0 | 0 | 0 | 0 | 0 | 0 | 0 | 0 | 0 | 0 | 0 | 0 |

2BN-Perylene-D

File Name = 2BN-Perylene-D

File Type = .log

Calculation Type = FOPT

Calculation Method = RM062X

Basis Set = 6-31+G(d)

Charge = 0

Spin = Singlet

E(RM062X) = -1551.91154942 a.u.

RMS Gradient Norm = 0.00001444 a.u.

Imaginary Freq =

Dipole Moment = 0.0004 Debye

Point Group = C1

Job CPU time: 4 days 14 hours 22 minutes 47.6 seconds.

\*\*\*\*\*

|         |         |         |   |   |   |   |   |   |   |   |   |   |   |   |   |
|---------|---------|---------|---|---|---|---|---|---|---|---|---|---|---|---|---|
| 0.1712  | 2.1131  | 1.6164  | N | 0 | 0 | 0 | 0 | 0 | 0 | 0 | 0 | 0 | 0 | 0 | 0 |
| -1.0531 | -2.1050 | -2.1870 | N | 0 | 0 | 0 | 0 | 0 | 0 | 0 | 0 | 0 | 0 | 0 | 0 |
| 0.9205  | -0.0341 | 0.4503  | C | 0 | 0 | 0 | 0 | 0 | 0 | 0 | 0 | 0 | 0 | 0 | 0 |
| 2.0733  | 0.0443  | 1.1911  | C | 0 | 0 | 0 | 0 | 0 | 0 | 0 | 0 | 0 | 0 | 0 | 0 |
| 2.2886  | 1.1165  | 2.1128  | C | 0 | 0 | 0 | 0 | 0 | 0 | 0 | 0 | 0 | 0 | 0 | 0 |
| 1.3677  | 2.0994  | 2.3070  | C | 0 | 0 | 0 | 0 | 0 | 0 | 0 | 0 | 0 | 0 | 0 | 0 |
| -0.7542 | 3.1036  | 1.8762  | C | 0 | 0 | 0 | 0 | 0 | 0 | 0 | 0 | 0 | 0 | 0 | 0 |
| -1.9598 | 3.1328  | 1.2456  | C | 0 | 0 | 0 | 0 | 0 | 0 | 0 | 0 | 0 | 0 | 0 | 0 |
| -2.3362 | 2.1461  | 0.2804  | C | 0 | 0 | 0 | 0 | 0 | 0 | 0 | 0 | 0 | 0 | 0 | 0 |
| -1.4919 | 1.1166  | -0.0515 | C | 0 | 0 | 0 | 0 | 0 | 0 | 0 | 0 | 0 | 0 | 0 | 0 |
| 0.6078  | -1.1077 | -0.5181 | C | 0 | 0 | 0 | 0 | 0 | 0 | 0 | 0 | 0 | 0 | 0 | 0 |
| 1.4296  | -2.1666 | -0.8087 | C | 0 | 0 | 0 | 0 | 0 | 0 | 0 | 0 | 0 | 0 | 0 | 0 |
| 1.0429  | -3.1712 | -1.7509 | C | 0 | 0 | 0 | 0 | 0 | 0 | 0 | 0 | 0 | 0 | 0 | 0 |
| -0.1503 | -3.1281 | -2.4019 | C | 0 | 0 | 0 | 0 | 0 | 0 | 0 | 0 | 0 | 0 | 0 | 0 |
| -2.2608 | -2.1102 | -2.8520 | C | 0 | 0 | 0 | 0 | 0 | 0 | 0 | 0 | 0 | 0 | 0 | 0 |
| -3.1954 | -1.1439 | -2.6392 | C | 0 | 0 | 0 | 0 | 0 | 0 | 0 | 0 | 0 | 0 | 0 | 0 |
| -2.9767 | -0.0688 | -1.7215 | C | 0 | 0 | 0 | 0 | 0 | 0 | 0 | 0 | 0 | 0 | 0 | 0 |
| -1.8049 | 0.0383  | -1.0148 | C | 0 | 0 | 0 | 0 | 0 | 0 | 0 | 0 | 0 | 0 | 0 | 0 |
| -0.1334 | 1.0587  | 0.6578  | B | 0 | 0 | 0 | 0 | 0 | 0 | 0 | 0 | 0 | 0 | 0 | 0 |
| -0.7466 | -1.0483 | -1.2300 | B | 0 | 0 | 0 | 0 | 0 | 0 | 0 | 0 | 0 | 0 | 0 | 0 |
| 2.8548  | -0.7121 | 1.1173  | H | 0 | 0 | 0 | 0 | 0 | 0 | 0 | 0 | 0 | 0 | 0 | 0 |
| 3.2082  | 1.1536  | 2.6883  | H | 0 | 0 | 0 | 0 | 0 | 0 | 0 | 0 | 0 | 0 | 0 | 0 |
| 1.5263  | 2.9145  | 3.0082  | H | 0 | 0 | 0 | 0 | 0 | 0 | 0 | 0 | 0 | 0 | 0 | 0 |

|         |         |           |   |   |   |   |   |   |   |   |   |   |   |   |   |
|---------|---------|-----------|---|---|---|---|---|---|---|---|---|---|---|---|---|
| -0.4624 | 3.8528  | 2.6075 H  | 0 | 0 | 0 | 0 | 0 | 0 | 0 | 0 | 0 | 0 | 0 | 0 | 0 |
| -2.6450 | 3.9383  | 1.4899 H  | 0 | 0 | 0 | 0 | 0 | 0 | 0 | 0 | 0 | 0 | 0 | 0 | 0 |
| -3.3232 | 2.2469  | -0.1710 H | 0 | 0 | 0 | 0 | 0 | 0 | 0 | 0 | 0 | 0 | 0 | 0 | 0 |
| 2.3953  | -2.2941 | -0.3193 H | 0 | 0 | 0 | 0 | 0 | 0 | 0 | 0 | 0 | 0 | 0 | 0 | 0 |
| 1.7010  | -4.0133 | -1.9410 H | 0 | 0 | 0 | 0 | 0 | 0 | 0 | 0 | 0 | 0 | 0 | 0 | 0 |
| -0.4581 | -3.8984 | -3.1046 H | 0 | 0 | 0 | 0 | 0 | 0 | 0 | 0 | 0 | 0 | 0 | 0 | 0 |
| -2.4235 | -2.9319 | -3.5440 H | 0 | 0 | 0 | 0 | 0 | 0 | 0 | 0 | 0 | 0 | 0 | 0 | 0 |
| -4.1275 | -1.2010 | -3.1922 H | 0 | 0 | 0 | 0 | 0 | 0 | 0 | 0 | 0 | 0 | 0 | 0 | 0 |
| -3.7776 | 0.6634  | -1.6153 H | 0 | 0 | 0 | 0 | 0 | 0 | 0 | 0 | 0 | 0 | 0 | 0 | 0 |
| 0.0973  | -1.1767 | 3.6309 N  | 0 | 0 | 0 | 0 | 0 | 0 | 0 | 0 | 0 | 0 | 0 | 0 | 0 |
| -1.1271 | -5.3945 | -0.1729 N | 0 | 0 | 0 | 0 | 0 | 0 | 0 | 0 | 0 | 0 | 0 | 0 | 0 |
| 0.8495  | -3.3193 | 2.4576 C  | 0 | 0 | 0 | 0 | 0 | 0 | 0 | 0 | 0 | 0 | 0 | 0 | 0 |
| 2.0218  | -3.2115 | 3.1634 C  | 0 | 0 | 0 | 0 | 0 | 0 | 0 | 0 | 0 | 0 | 0 | 0 | 0 |
| 2.2405  | -2.1364 | 4.0812 C  | 0 | 0 | 0 | 0 | 0 | 0 | 0 | 0 | 0 | 0 | 0 | 0 | 0 |
| 1.3052  | -1.1711 | 4.2953 C  | 0 | 0 | 0 | 0 | 0 | 0 | 0 | 0 | 0 | 0 | 0 | 0 | 0 |
| -0.8055 | -0.1535 | 3.8457 C  | 0 | 0 | 0 | 0 | 0 | 0 | 0 | 0 | 0 | 0 | 0 | 0 | 0 |
| -1.9985 | -0.1103 | 3.1945 C  | 0 | 0 | 0 | 0 | 0 | 0 | 0 | 0 | 0 | 0 | 0 | 0 | 0 |
| -2.3853 | -1.1148 | 2.2522 C  | 0 | 0 | 0 | 0 | 0 | 0 | 0 | 0 | 0 | 0 | 0 | 0 | 0 |
| -1.5636 | -2.1738 | 1.9617 C  | 0 | 0 | 0 | 0 | 0 | 0 | 0 | 0 | 0 | 0 | 0 | 0 | 0 |
| 0.5364  | -4.3977 | 1.4946 C  | 0 | 0 | 0 | 0 | 0 | 0 | 0 | 0 | 0 | 0 | 0 | 0 | 0 |
| 1.3806  | -5.4274 | 1.1628 C  | 0 | 0 | 0 | 0 | 0 | 0 | 0 | 0 | 0 | 0 | 0 | 0 | 0 |
| 1.0040  | -6.4142 | 0.1978 C  | 0 | 0 | 0 | 0 | 0 | 0 | 0 | 0 | 0 | 0 | 0 | 0 | 0 |
| -0.2017 | -6.3850 | -0.4327 C | 0 | 0 | 0 | 0 | 0 | 0 | 0 | 0 | 0 | 0 | 0 | 0 | 0 |
| -2.3238 | -5.3811 | -0.8631 C | 0 | 0 | 0 | 0 | 0 | 0 | 0 | 0 | 0 | 0 | 0 | 0 | 0 |
| -3.2448 | -4.3983 | -0.6687 C | 0 | 0 | 0 | 0 | 0 | 0 | 0 | 0 | 0 | 0 | 0 | 0 | 0 |
| -3.0294 | -3.3261 | 0.2531 C  | 0 | 0 | 0 | 0 | 0 | 0 | 0 | 0 | 0 | 0 | 0 | 0 | 0 |
| -1.8762 | -3.2472 | 0.9932 C  | 0 | 0 | 0 | 0 | 0 | 0 | 0 | 0 | 0 | 0 | 0 | 0 | 0 |
| -0.2091 | -2.2332 | 2.6736 B  | 0 | 0 | 0 | 0 | 0 | 0 | 0 | 0 | 0 | 0 | 0 | 0 | 0 |

|         |         |         |   |   |   |   |   |   |   |   |   |   |   |   |   |   |
|---------|---------|---------|---|---|---|---|---|---|---|---|---|---|---|---|---|---|
| -0.8223 | -4.3399 | 0.7854  | B | 0 | 0 | 0 | 0 | 0 | 0 | 0 | 0 | 0 | 0 | 0 | 0 | 0 |
| 2.8232  | -3.9431 | 3.0564  | H | 0 | 0 | 0 | 0 | 0 | 0 | 0 | 0 | 0 | 0 | 0 | 0 | 0 |
| 3.1730  | -2.0788 | 4.6334  | H | 0 | 0 | 0 | 0 | 0 | 0 | 0 | 0 | 0 | 0 | 0 | 0 | 0 |
| 1.4680  | -0.3494 | 4.9873  | H | 0 | 0 | 0 | 0 | 0 | 0 | 0 | 0 | 0 | 0 | 0 | 0 | 0 |
| -0.4976 | 0.6168  | 4.5484  | H | 0 | 0 | 0 | 0 | 0 | 0 | 0 | 0 | 0 | 0 | 0 | 0 | 0 |
| -2.6566 | 0.7320  | 3.3844  | H | 0 | 0 | 0 | 0 | 0 | 0 | 0 | 0 | 0 | 0 | 0 | 0 | 0 |
| -3.3508 | -0.9869 | 1.7625  | H | 0 | 0 | 0 | 0 | 0 | 0 | 0 | 0 | 0 | 0 | 0 | 0 | 0 |
| 2.3674  | -5.5284 | 1.6145  | H | 0 | 0 | 0 | 0 | 0 | 0 | 0 | 0 | 0 | 0 | 0 | 0 | 0 |
| 1.6891  | -7.2197 | -0.0465 | H | 0 | 0 | 0 | 0 | 0 | 0 | 0 | 0 | 0 | 0 | 0 | 0 | 0 |
| -0.4935 | -7.1343 | -1.1639 | H | 0 | 0 | 0 | 0 | 0 | 0 | 0 | 0 | 0 | 0 | 0 | 0 | 0 |
| -2.4825 | -6.1962 | -1.5642 | H | 0 | 0 | 0 | 0 | 0 | 0 | 0 | 0 | 0 | 0 | 0 | 0 | 0 |
| -4.1646 | -4.4357 | -1.2438 | H | 0 | 0 | 0 | 0 | 0 | 0 | 0 | 0 | 0 | 0 | 0 | 0 | 0 |
| -3.8113 | -2.5701 | 0.3276  | H | 0 | 0 | 0 | 0 | 0 | 0 | 0 | 0 | 0 | 0 | 0 | 0 | 0 |

## References:

- [1] a) A. D. Becke, *J. Chem. Phys.* **1993**, 98, 5648; b) P. J. Stephens, F. J. Devlin, C. F. Chabalowski, M. J. Frisch, *J. Phys. Chem.* **1994**, 98, 11623; c) C. Lee, W. Yang, R. G. Parr, *Phys. Rev. B: Condens. Matter Mater. Phys.* **1988**, 37, 785.
- [2] M. J. Frisch, G. W. Trucks, H. B. Schlegel, G. E. Scuseria, M. A. Robb, J. R. Cheeseman, G. Scalmani, V. Barone, B. Mennucci, G. A. Petersson, H. Nakatsuji, M. Caricato, X. Li, H. P. Hratchian, A. F. Izmaylov, J. Bloino, G. Zheng, J. L. Sonnenberg, M. Hada, M. Ehara, K. Toyota, R. Fukuda, J. Hasegawa, M. Ishida, T. Nakajima, Y. Honda, O. Kitao, H. Nakai, T. Vreven, J. A., Jr. Montgomery, J. E. Peralta, F. Ogliaro, M. Bearpark, J. J. Heyd, E. Brothers, K. N. Kudin, V. N. Staroverov, R. Kobayashi, J. Normand, K. Raghavachari, A. Rendell, J. C. Burant, S. S. Iyengar, J. Tomasi, M. Cossi, N. Rega, N. J. Millam, M. Klene, J. E. Knox, J. B. Cross, V. Bakken, C. Adamo, J. Jaramillo, R. Gomperts, R. E. Stratmann, O. Yazyev, A. J. Austin, R. Cammi, C. Pomelli, J. W. Ochterski, R. L. Martin, K. Morokuma, V. G. Zakrzewski, G. A. Voth, P. Salvador, J. J. Dannenberg, S. Dapprich, A. D. Daniels, O. Farkas,

J. B. Foresman, J. V. Ortiz, J. Cioslowski, D. J. Fox, *Gaussian 09*, Revision D.01; Gaussian, Inc.: Wallingford, CT, 2009.

[3] Y. Zhao and D. G. Truhlar, *Theor. Chem. Acc.*, **2008**, *120*, 215.

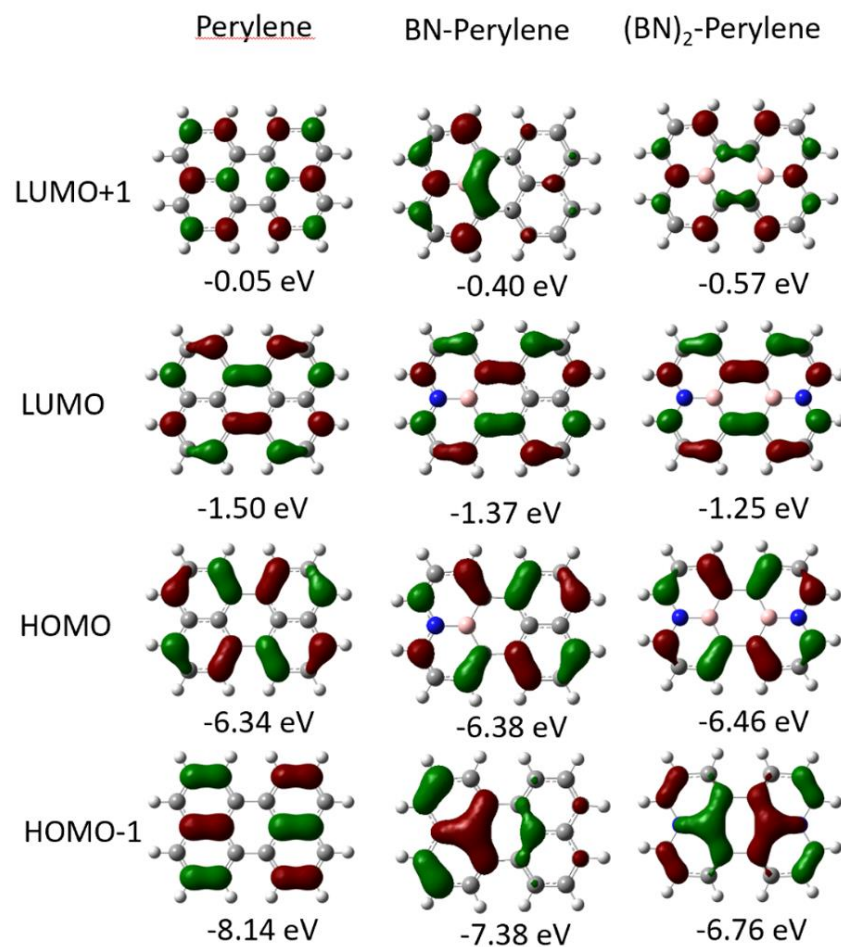

# NMR Spectra and HRMS

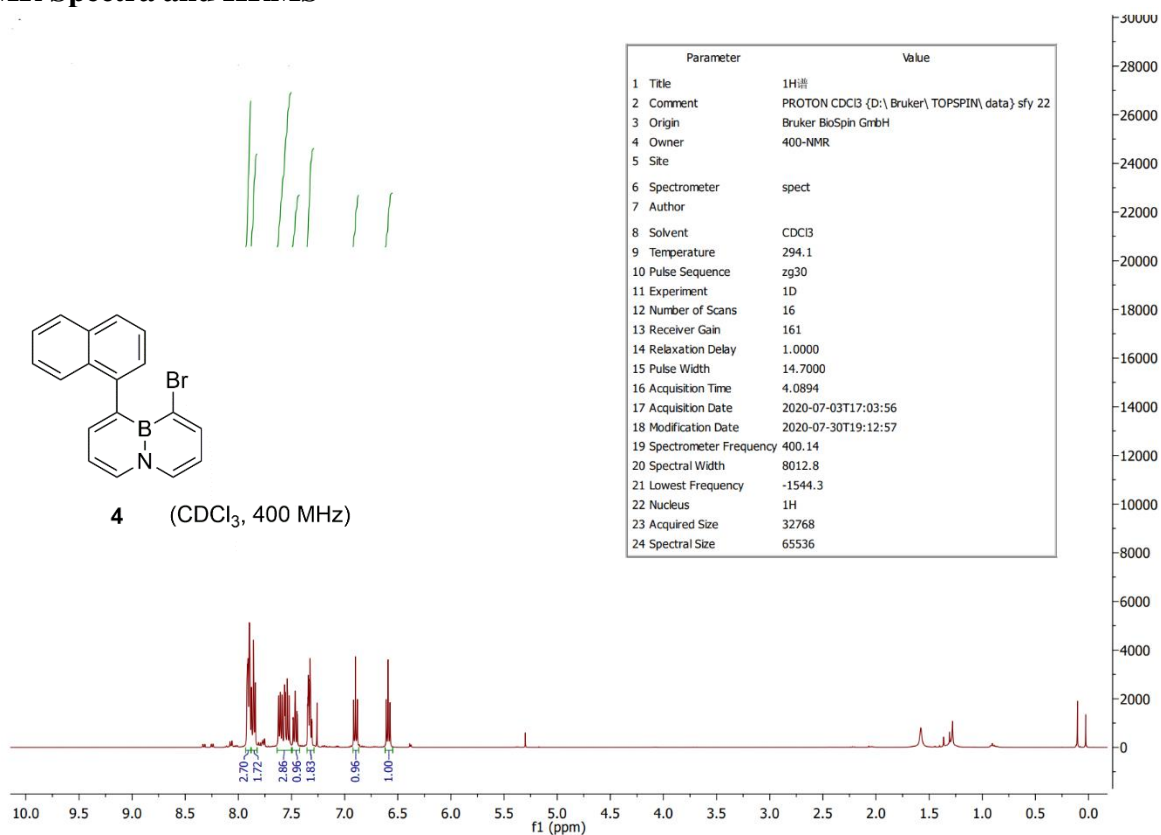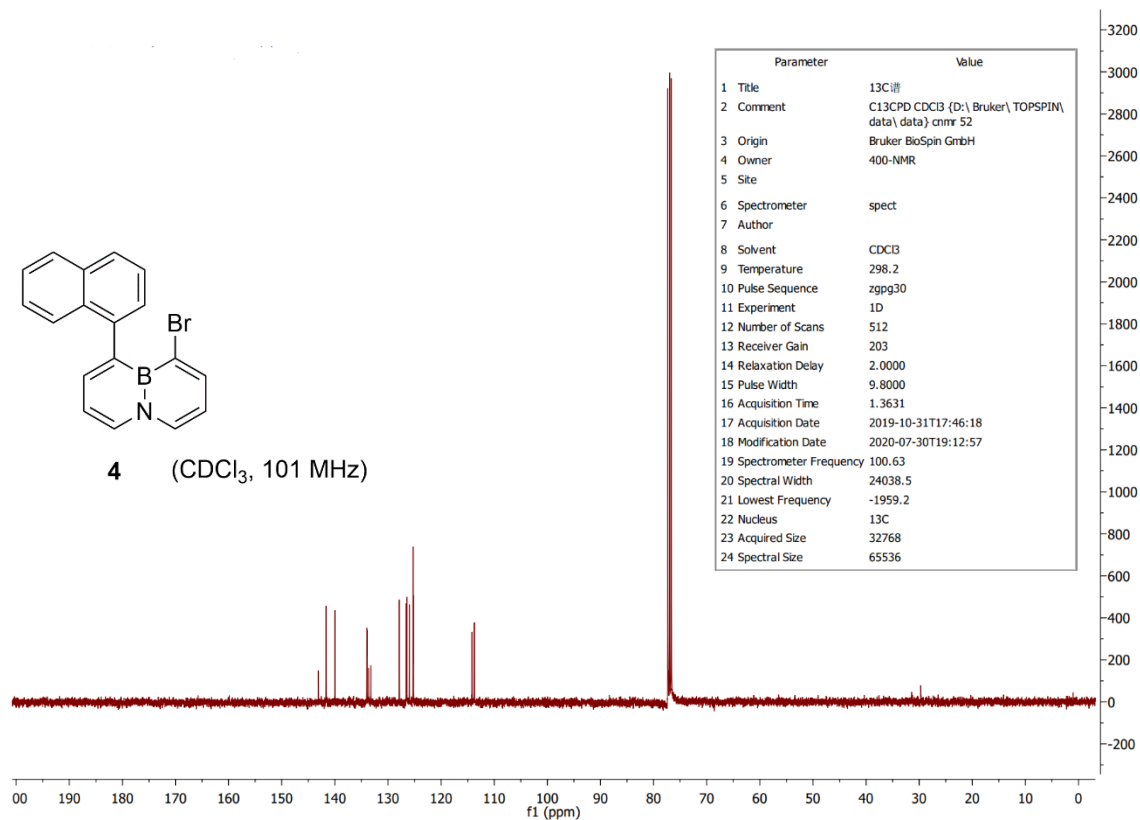

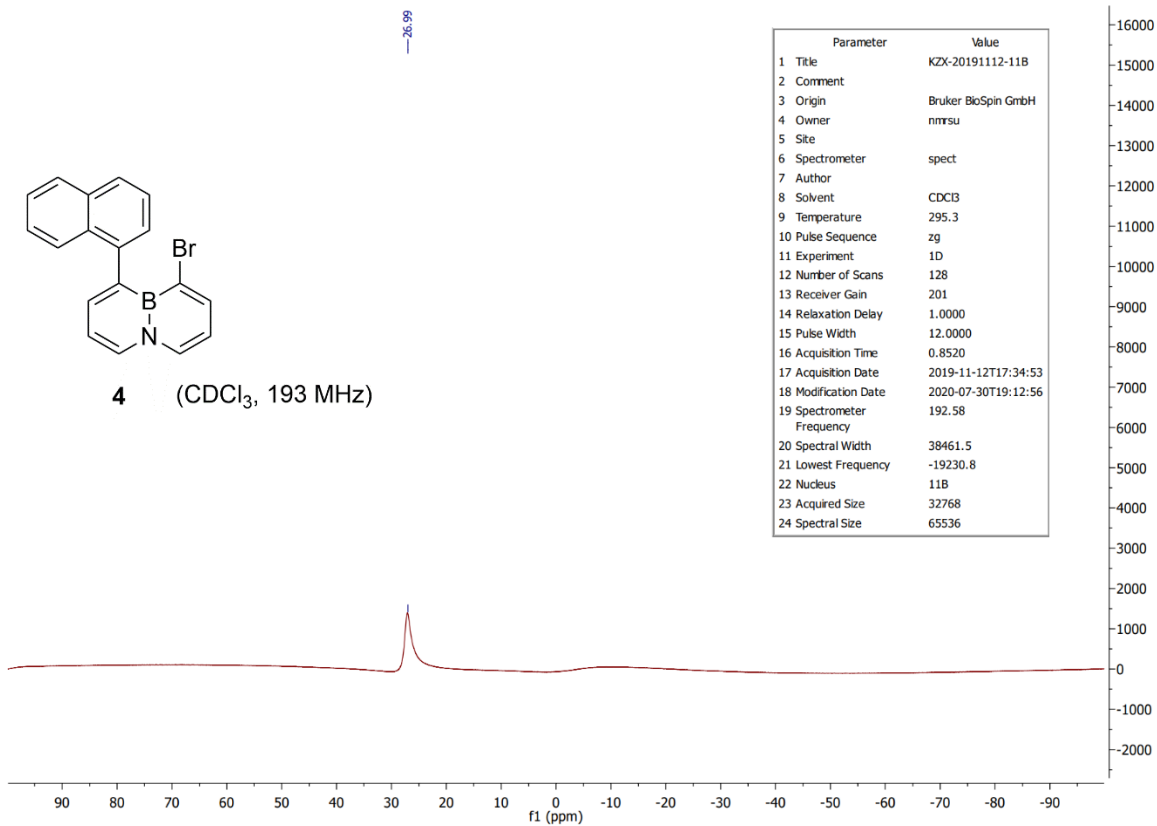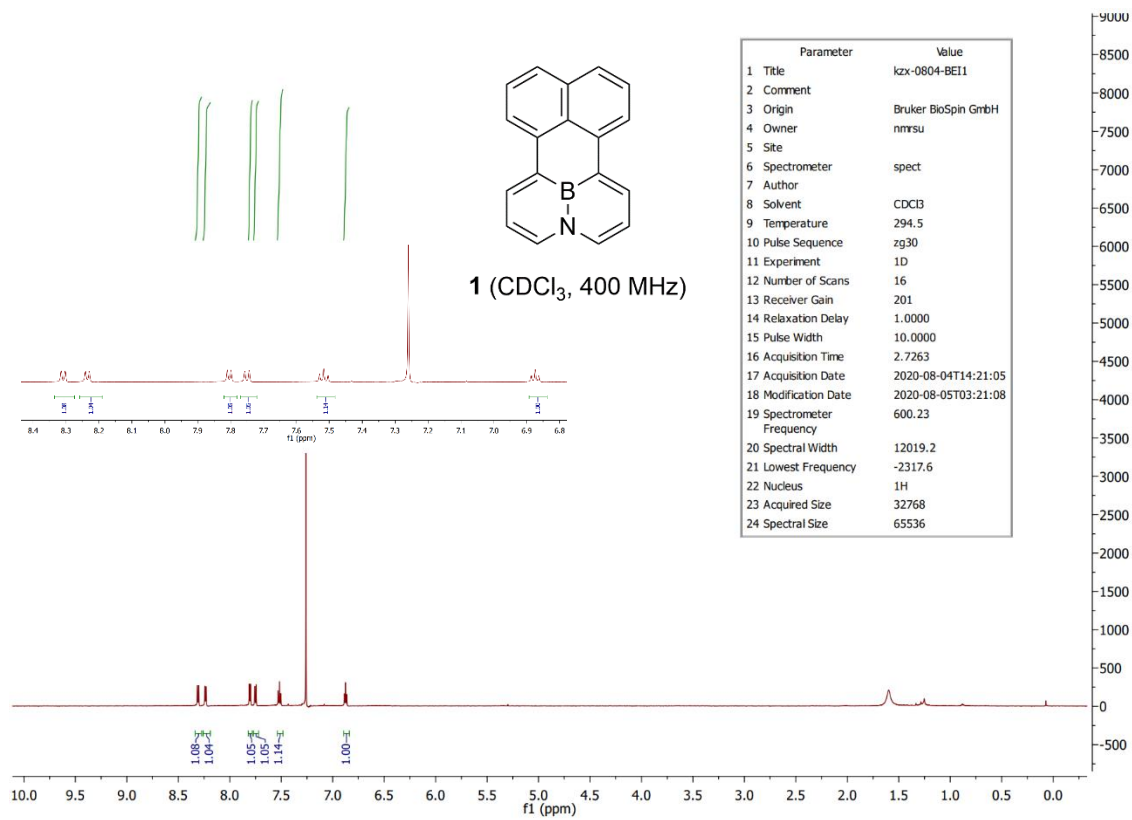

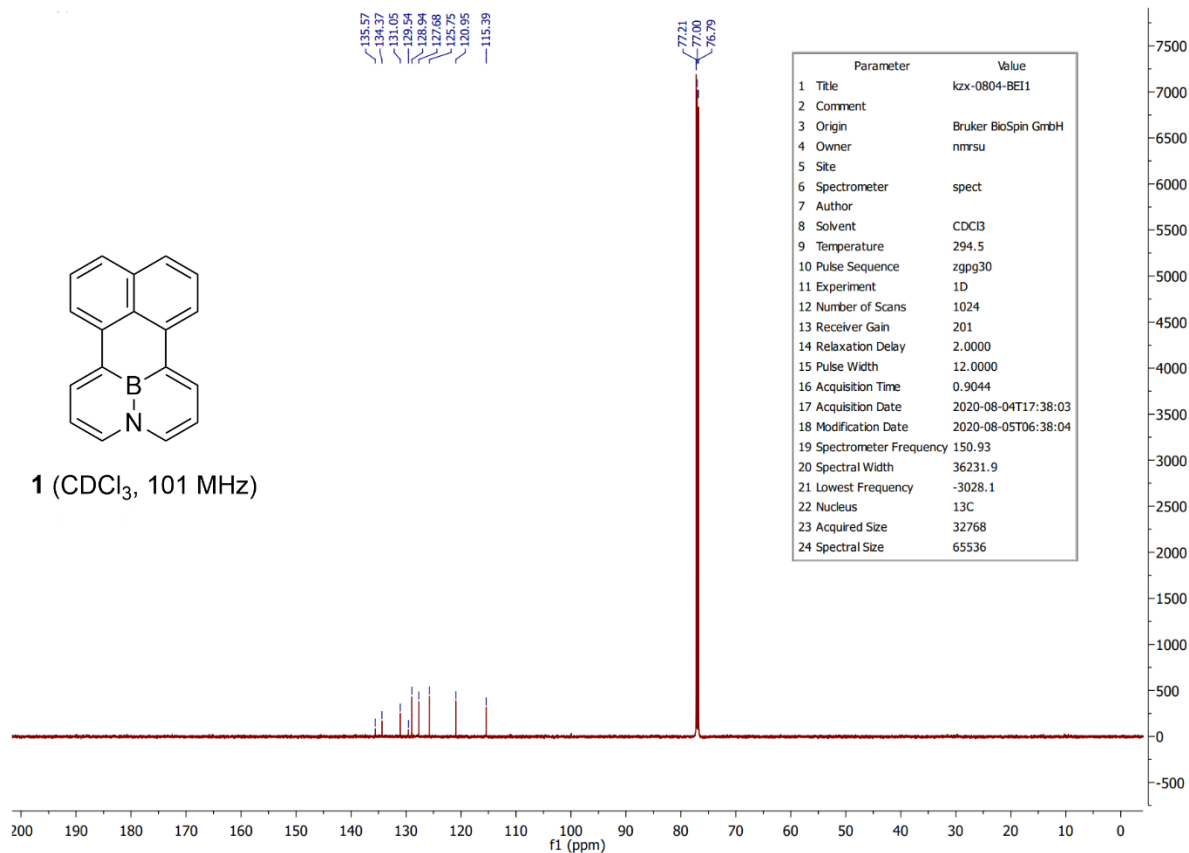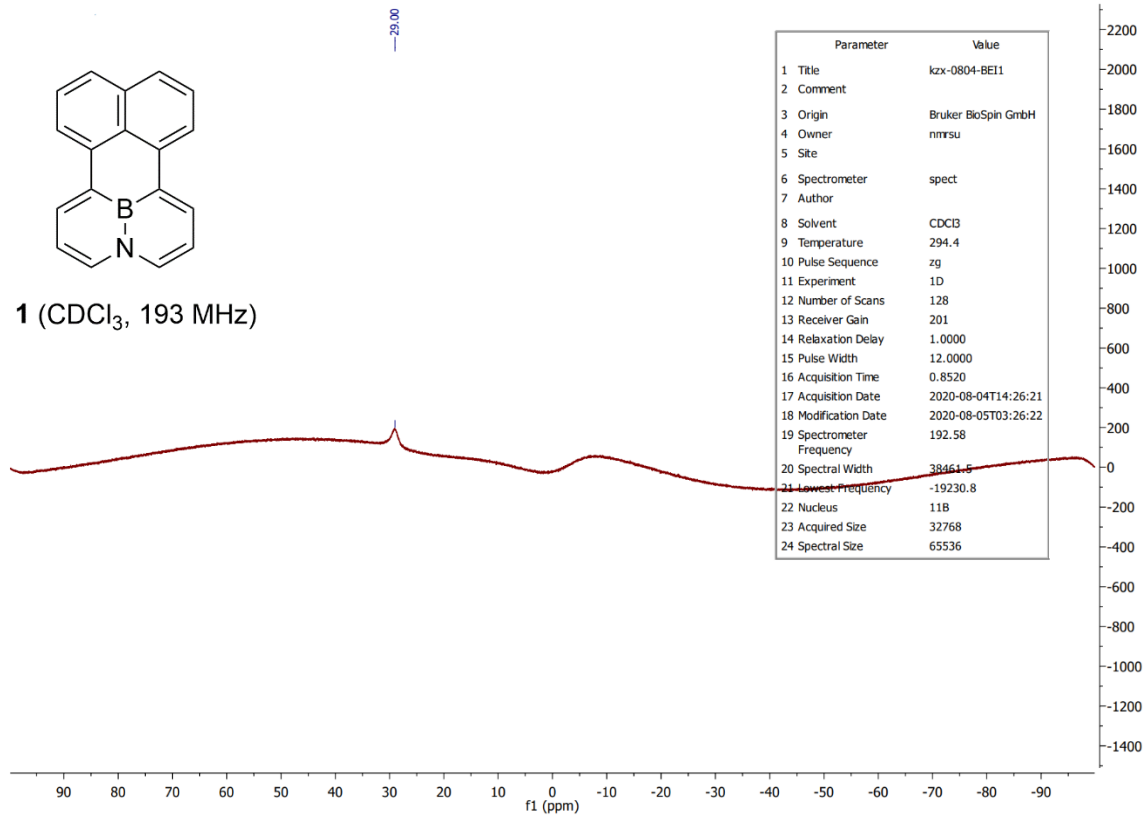



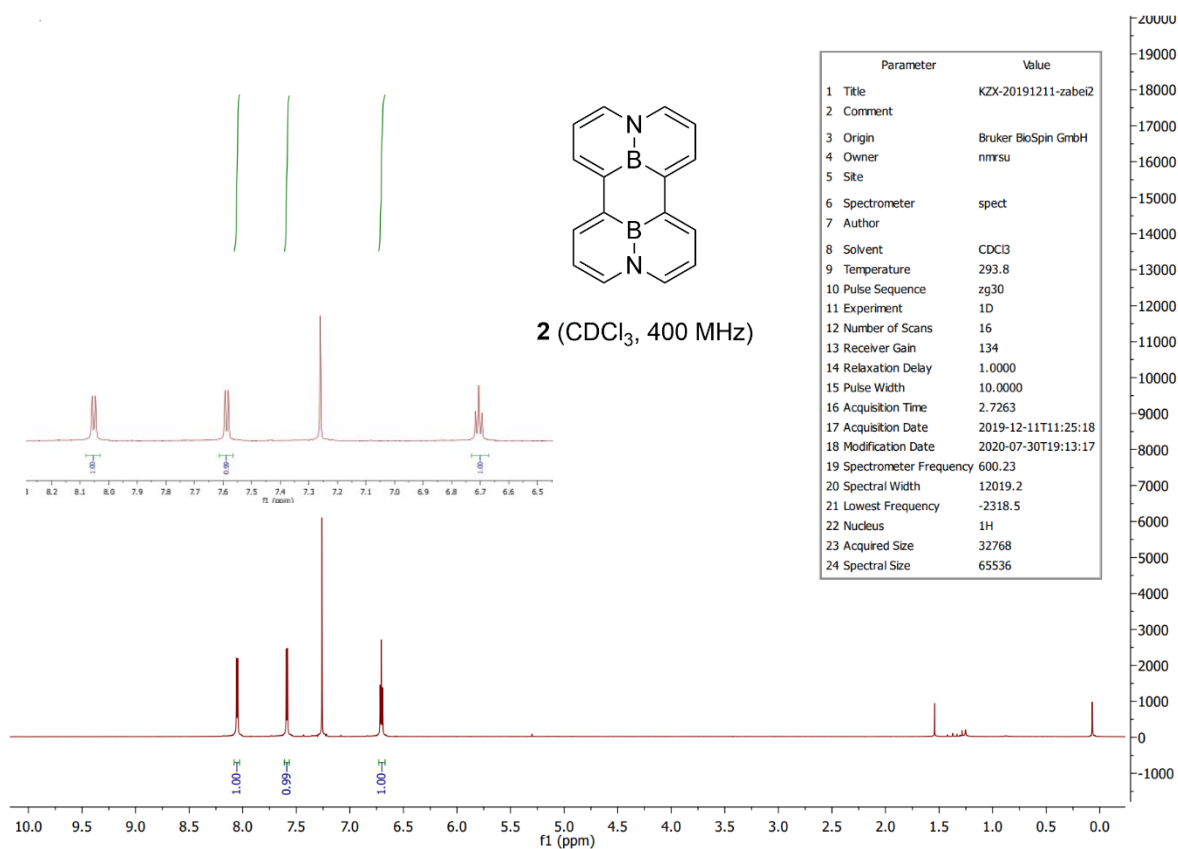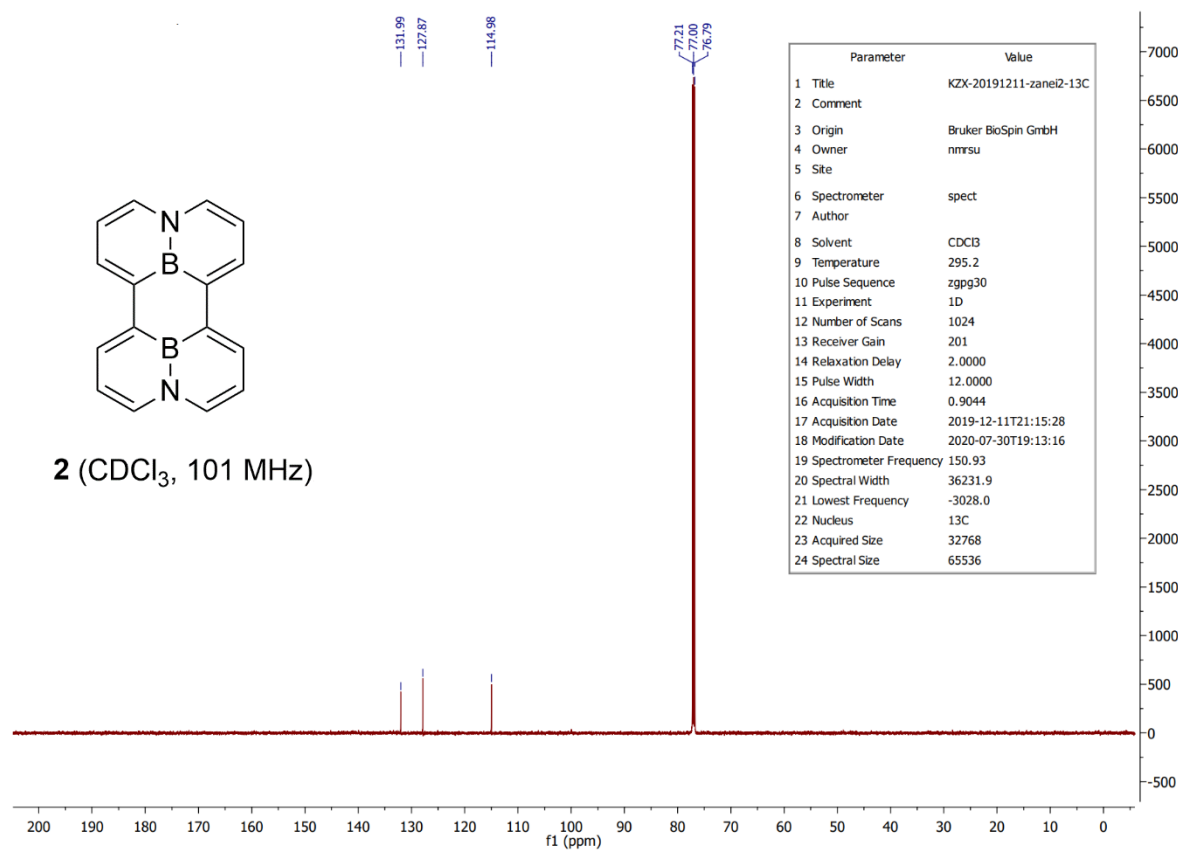

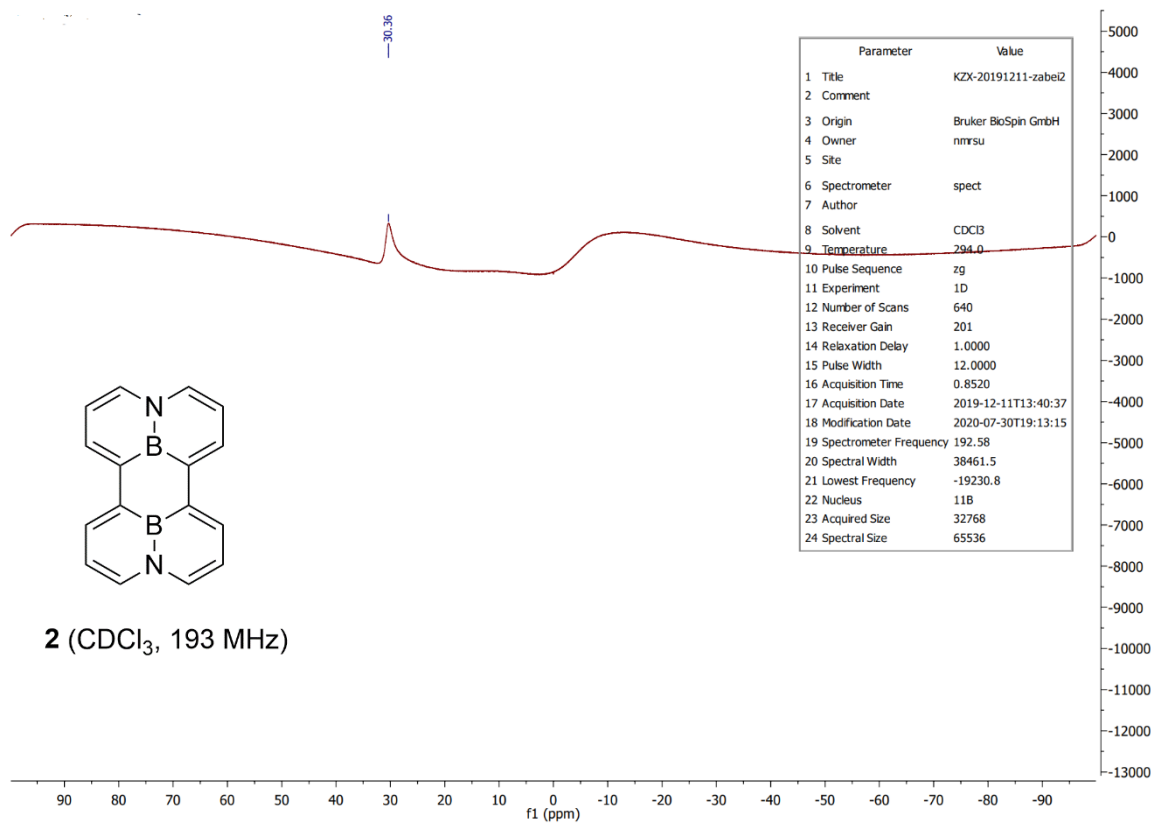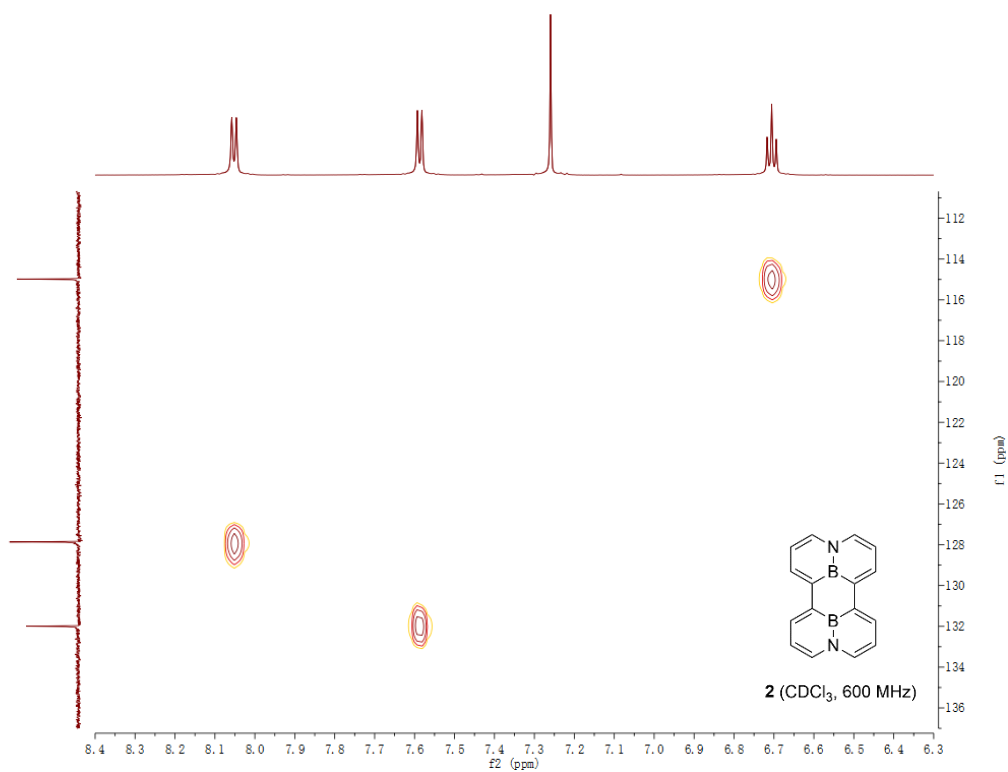

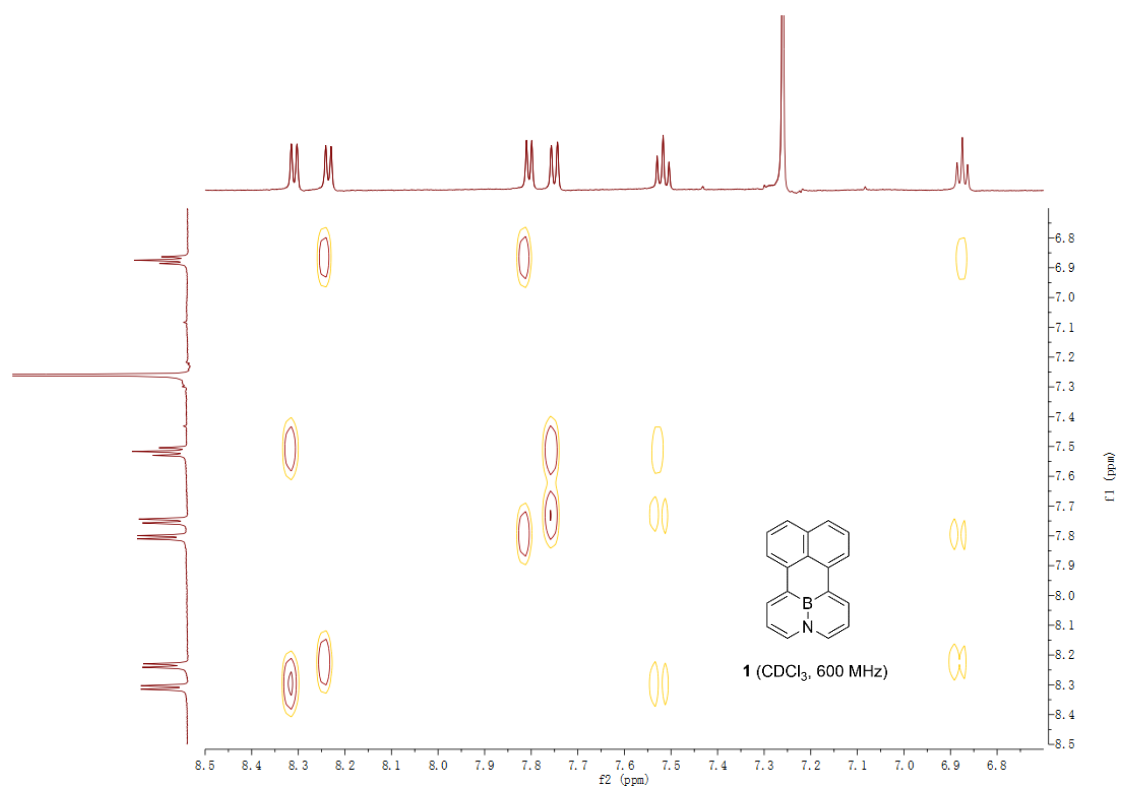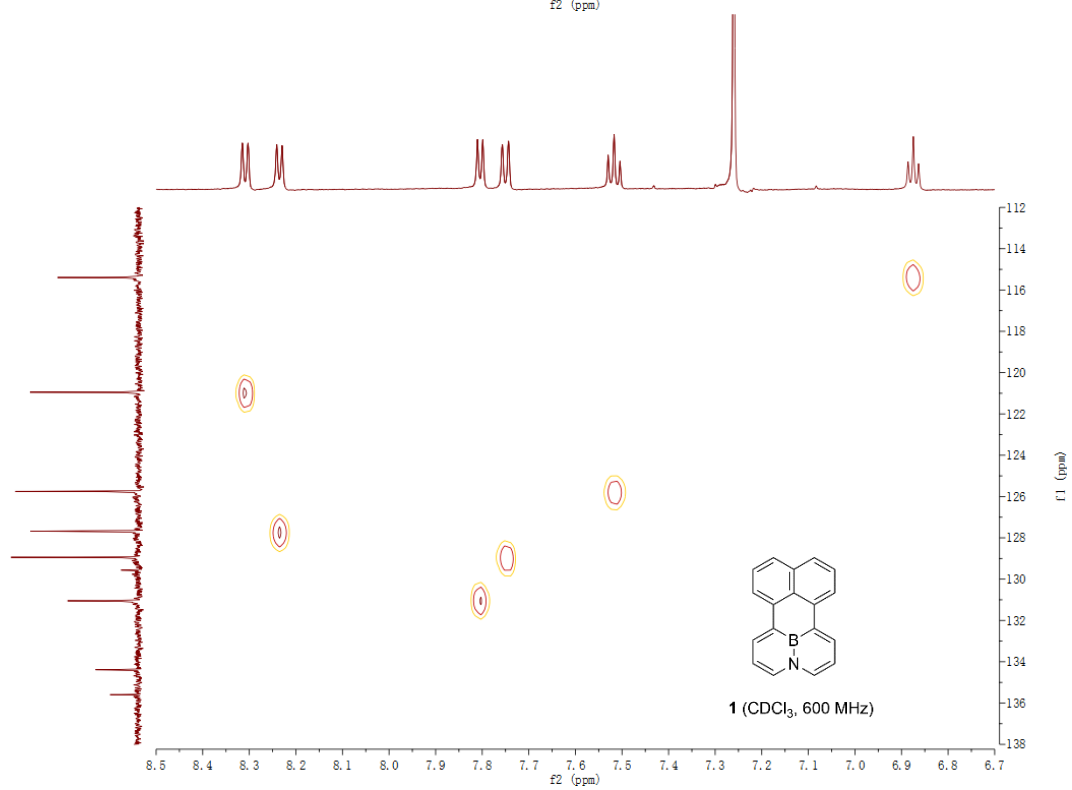

File : E:\5973N DATE\201912\1218\Snapshot\H192978.D  
 Acquired : 18 Dec 2019 12:38  
 Sample Name : k2x-3  
 Instrument : Agilent Technologies 5973N  
 : National Center for Organic Mass Spectrometry in Shanghai, Shanghai Institute of Organic Chemistry

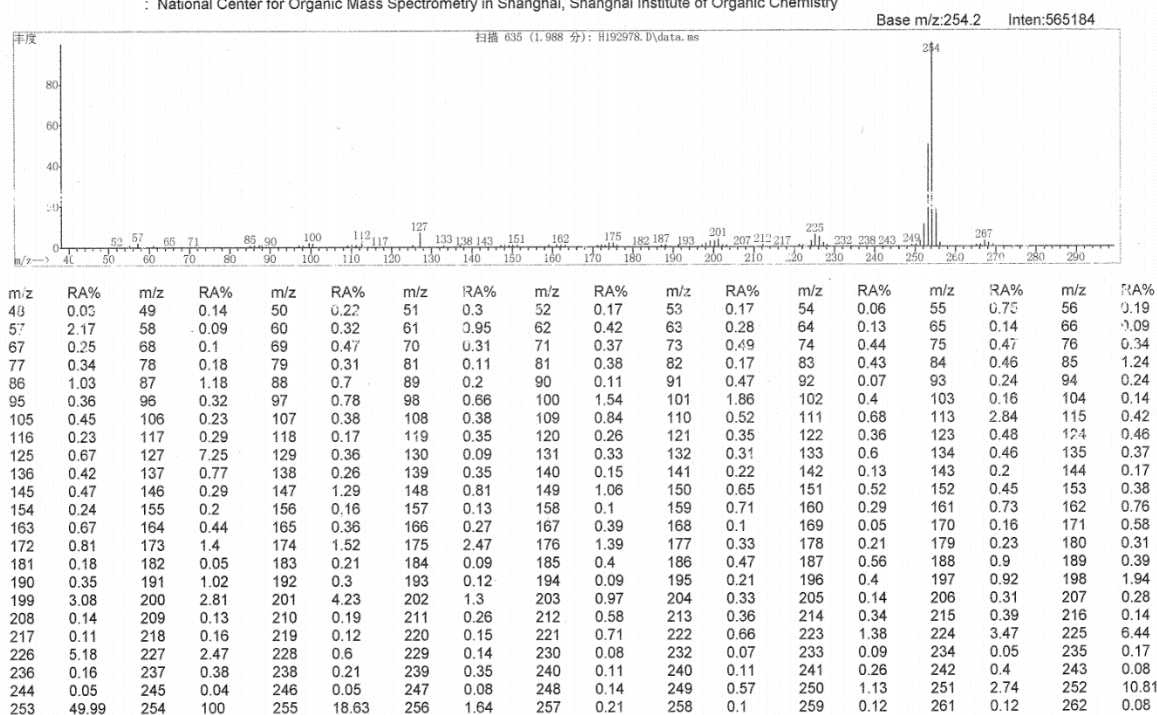

|               |      |     |       |     |       |     |       |     |      |     |      |     |      |     |      |     |      |
|---------------|------|-----|-------|-----|-------|-----|-------|-----|------|-----|------|-----|------|-----|------|-----|------|
| 263           | 0.11 | 264 | 0.38  | 265 | 0.58  | 266 | 1.31  | 267 | 3.05 | 268 | 2.01 | 269 | 0.6  | 270 | 0.34 | 271 | 0.23 |
| 272           | 0.05 | 272 | 0.06  | 273 | 0.11  | 274 | 0.05  | 275 | 0.14 | 276 | 0.06 | 277 | 0.08 | 278 | 0.11 | 279 | 0.14 |
| 280           | 0.2  | 281 | 0.34  | 282 | 0.24  | 283 | 0.16  | 284 | 0.19 | 285 | 0.04 | 286 | 0.08 | 287 | 0.06 | 288 | 0.07 |
| 289           | 0.03 | 289 | 0.06  |     |       |     |       |     |      |     |      |     |      |     |      |     |      |
| 8 Peak Value: |      |     |       |     |       |     |       |     |      |     |      |     |      |     |      |     |      |
| 254           | 100  | 253 | 49.99 | 255 | 18.63 | 252 | 10.81 | 127 | 7.25 | 225 | 6.44 | 226 | 5.18 | 201 | 4.23 |     |      |

National Center for Organic Mass Spectrometry in Shanghai  
Shanghai Institute of Organic Chemistry  
Chinese Academic of Sciences  
High Resolution MS Data Report

Instrument: Waters Micromass GCT Premier      Ionisation Mode: EI+      Electron Energy: 70eV

Card Serial Number: GCT-P-T19-12-0064

Sample Serial Number: 2011770-20191216-KZX-3

Operator: Li

Date: 2019/12/23

Elemental Composition Report

Single Mass Analysis  
Tolerance = 5.0 PPM / DBE: min = -1.5, max = 50.0  
Element prediction: Off

Monoisotopic Mass, Odd and Even Electron Ions  
349 formula(e) evaluated with 3 results within limits (up to 50 closest results for each mass)  
Elements Used:  
C: 0-50    H: 0-80    N: 0-2    O: 0-2    F: 0-3    10B: 0-2

| Minimum: |            | 2.0  | 5.0  | -1.5 |         |                   |
|----------|------------|------|------|------|---------|-------------------|
| Maximum: |            | 50.0 |      |      |         |                   |
| Mass     | Calc. Mass | mDa  | PPM  | DBE  | i-FIT   | Formula           |
| 252.1252 | 252.1259   | -0.7 | -2.8 | 13.0 | 228.6   | C16 H12 N2 10B2   |
|          | 252.1248   | 0.4  | 1.6  | 5.5  | 6445.5  | C13 H16 O2 F2 10B |
|          | 252.1263   | -1.1 | -4.4 | 10.0 | 11105.4 | C16 H16 N2 O      |

File : E:\5973N date\2019\201912\1218\H192977.D  
 Acquired : 18 Dec 2019 12:21  
 Sample Name : k2x-2  
 Instrument : Agilent Technologies 5973N  
 : National Center for Organic Mass Spectrometry in Shanghai, Shanghai Institute of Organic Chemistry

Base m/z:253.2 Inten:783168

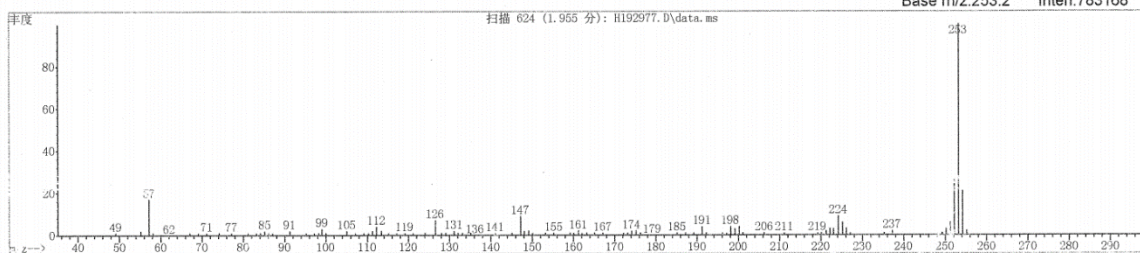

| m/z           | RA%  | m/z | RA%   | m/z | RA%   | m/z | RA%   | m/z | RA%   | m/z | RA%  | m/z | RA%   | m/z | RA%  | m/z | RA%  |
|---------------|------|-----|-------|-----|-------|-----|-------|-----|-------|-----|------|-----|-------|-----|------|-----|------|
| 45            | 0.11 | 47  | 0.09  | 48  | 0.07  | 49  | 0.5   | 50  | 0.24  | 51  | 0.39 | 52  | 0.08  | 53  | 0.25 | 54  | 0.14 |
| 55            | 2.27 | 56  | 0.39  | 57  | 16.81 | 58  | 0.81  | 59  | 0.15  | 60  | 0.22 | 61  | 0.38  | 62  | 0.2  | 63  | 0.46 |
| 64            | 0.11 | 65  | 0.32  | 66  | 0.07  | 67  | 0.5   | 68  | 0.27  | 69  | 1.42 | 70  | 0.44  | 71  | 1.29 | 72  | 0.22 |
| 73            | 0.37 | 74  | 0.57  | 75  | 0.42  | 76  | 0.11  | 77  | 0.52  | 78  | 0.21 | 79  | 0.35  | 80  | 0.15 | 81  | 0.75 |
| 82            | 0.45 | 83  | 1.19  | 84  | 0.86  | 85  | 1.58  | 86  | 1.1   | 87  | 1.08 | 88  | 0.24  | 89  | 0.16 | 90  | 0.05 |
| 91            | 2.2  | 92  | 0.29  | 93  | 0.37  | 94  | 0.2   | 95  | 0.52  | 96  | 0.29 | 97  | 1.29  | 98  | 1.11 | 99  | 2.87 |
| 100           | 1.31 | 102 | 0.08  | 103 | 0.22  | 104 | 0.32  | 105 | 1.76  | 106 | 0.37 | 107 | 0.64  | 108 | 0.23 | 109 | 0.89 |
| 110           | 0.58 | 111 | 2.11  | 112 | 3.96  | 113 | 1.52  | 115 | 0.91  | 116 | 0.39 | 117 | 1.3   | 118 | 0.3  | 119 | 1.41 |
| 120           | 0.29 | 121 | 0.57  | 122 | 0.45  | 123 | 0.47  | 124 | 0.54  | 127 | 7.49 | 128 | 0.69  | 129 | 0.73 | 130 | 0.32 |
| 131           | 1.76 | 132 | 0.91  | 133 | 1.22  | 134 | 0.33  | 135 | 0.6   | 136 | 0.19 | 137 | 0.4   | 138 | 0.22 | 139 | 0.42 |
| 140           | 0.11 | 141 | 0.54  | 142 | 0.31  | 143 | 0.46  | 144 | 0.19  | 145 | 0.72 | 146 | 0.46  | 147 | 8.62 | 148 | 1.81 |
| 149           | 1.92 | 150 | 0.67  | 151 | 0.32  | 152 | 0.19  | 153 | 0.52  | 154 | 0.24 | 155 | 0.59  | 156 | 0.14 | 157 | 0.32 |
| 158           | 0.24 | 159 | 1.42  | 160 | 0.51  | 161 | 1.87  | 162 | 0.53  | 163 | 1.37 | 164 | 0.26  | 165 | 0.67 | 166 | 0.17 |
| 167           | 0.67 | 168 | 0.16  | 169 | 0.27  | 170 | 0.13  | 171 | 0.41  | 172 | 1.03 | 173 | 0.91  | 174 | 1.84 | 175 | 2.2  |
| 176           | 0.56 | 177 | 0.36  | 178 | 0.35  | 179 | 0.26  | 180 | 0.15  | 181 | 0.2  | 182 | 0.15  | 183 | 0.3  | 184 | 0.19 |
| 185           | 0.66 | 186 | 0.45  | 187 | 1.08  | 188 | 0.42  | 189 | 1.35  | 190 | 0.48 | 191 | 4.16  | 192 | 0.78 | 193 | 0.28 |
| 194           | 0.22 | 195 | 0.29  | 196 | 0.72  | 197 | 1.49  | 198 | 3.89  | 199 | 2.65 | 200 | 3.67  | 201 | 1.18 | 202 | 0.41 |
| 203           | 0.26 | 204 | 0.19  | 205 | 0.43  | 206 | 0.53  | 207 | 0.32  | 208 | 0.3  | 209 | 0.33  | 210 | 0.18 | 211 | 0.53 |
| 212           | 0.33 | 213 | 0.29  | 214 | 0.28  | 215 | 0.19  | 216 | 0.09  | 217 | 0.11 | 218 | 0.13  | 219 | 1.01 | 220 | 0.63 |
| 221           | 1.5  | 222 | 2.54  | 223 | 3.16  | 224 | 9.06  | 225 | 6.06  | 226 | 2.7  | 227 | 1.03  | 228 | 0.12 | 229 | 0.16 |
| 230           | 0.06 | 231 | 0.05  | 232 | 0.03  | 233 | 0.16  | 235 | 0.58  | 236 | 0.2  | 237 | 1.67  | 238 | 0.36 | 239 | 0.29 |
| 240           | 0.05 | 241 | 0.04  | 241 | 0.06  | 242 | 0.09  | 243 | 0.04  | 244 | 0.05 | 245 | 0.05  | 246 | 0.08 | 247 | 0.21 |
| 248           | 0.42 | 249 | 1.41  | 250 | 3.13  | 251 | 5.69  | 252 | 25.94 | 253 | 100  | 254 | 21.47 | 255 | 2.26 | 256 | 0.2  |
|               |      |     |       |     |       |     |       |     |       |     |      |     |       |     |      |     |      |
| 257           | 0.07 | 258 | 0.03  | 259 | 0.07  | 260 | 0.03  | 261 | 0.25  | 262 | 0.13 | 263 | 0.1   | 264 | 0.12 | 265 | 0.18 |
| 266           | 0.13 | 267 | 0.2   | 268 | 0.07  | 269 | 0.11  | 271 | 0.08  | 272 | 0.03 | 273 | 0.17  | 274 | 0.09 | 275 | 0.08 |
| 277           | 0.07 | 278 | 0.06  | 279 | 0.23  | 280 | 0.18  | 281 | 0.23  | 282 | 0.06 | 283 | 0.14  | 284 | 0.1  | 285 | 0.28 |
| 286           | 0.12 | 287 | 0.22  | 288 | 0.09  | 288 | 0.08  | 289 | 0.32  |     |      |     |       |     |      |     |      |
| 8 Peak Value: |      |     |       |     |       |     |       |     |       |     |      |     |       |     |      |     |      |
| 253           | 100  | 252 | 25.94 | 254 | 21.47 | 57  | 16.81 | 224 | 9.06  | 147 | 8.62 | 127 | 7.49  | 225 | 6.06 |     |      |



National Center for Organic Mass Spectrometry in Shanghai  
Shanghai Institute of Organic Chemistry  
Chinese Academic of Sciences  
High Resolution MS Data Report

Instrument: Waters Micromass GCT Premier Ionisation Mode: EI+ Electron Energy: 70eV

Card Serial Number: GCT-P-T19-12-0065

Sample Serial Number: 2011770-20191216-KZX-2

Operator: Li

Date: 2019/12/23

Elemental Composition Report

Single Mass Analysis  
Tolerance = 5.0 PPM / DBE: min = -1.5, max = 50.0  
Element prediction: Off

Monoisotopic Mass, Odd and Even Electron Ions  
349 formula(e) evaluated with 2 results within limits (up to 50 closest results for each mass)

Elements Used:

C: 0-50 H: 0-80 N: 0-2 O: 0-2 F: 0-3 10B: 0-2

|          |            |      |      |      |       |                   |
|----------|------------|------|------|------|-------|-------------------|
| Minimum: |            |      |      |      |       |                   |
| Maximum: |            |      |      |      |       |                   |
| Mass     | Calc. Mass | mDa  | PPM  | DBE  | i-FIT | Formula           |
| 252.1102 | 252.1099   | 0.3  | 1.2  | 14.0 | 16.0  | C18 H12 N 10B     |
|          | 252.1111   | -0.9 | -3.6 | 10.0 | 15.5  | C15 H13 N O F 10B |

File : E:\5973N DATE\2019\201912\1218\Snapshot\H192976.D  
Acquired : 18 Dec 2019 12:18  
Sample Name : k2x-1  
Instrument : Agilent Technologies 5973N  
National Center for Organic Mass Spectrometry in Shanghai, Shanghai Institute of Organic Chemistry

Base m/z:254.2 Inten:623424

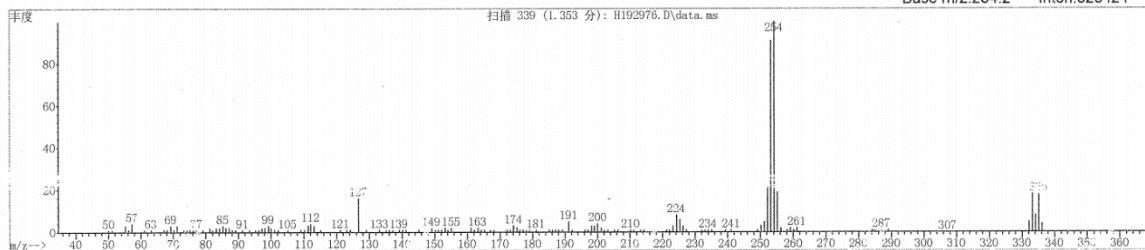

| m/z | RA%  | m/z | RA%  | m/z | RA%  | m/z | RA%   | m/z | RA%   | m/z | RA%   | m/z | RA%   | m/z | RA%  | m/z | RA%  |
|-----|------|-----|------|-----|------|-----|-------|-----|-------|-----|-------|-----|-------|-----|------|-----|------|
| 45  | 0.11 | 47  | 0.14 | 48  | 0.07 | 49  | 0.4   | 50  | 0.52  | 51  | 0.68  | 52  | 0.28  | 53  | 0.25 | 54  | 0.23 |
| 55  | 2.66 | 56  | 1.17 | 57  | 4.25 | 58  | 0.32  | 59  | 0.39  | 60  | 0.44  | 61  | 0.77  | 62  | 0.45 | 63  | 0.69 |
| 64  | 0.23 | 65  | 0.32 | 66  | 0.11 | 67  | 1.04  | 68  | 0.55  | 69  | 2.54  | 70  | 1.21  | 71  | 2.6  | 72  | 0.39 |
| 73  | 0.96 | 74  | 1.33 | 75  | 0.99 | 76  | 0.59  | 77  | 1.11  | 78  | 0.23  | 79  | 0.56  | 80  | 0.17 | 80  | 0.17 |
| 81  | 1.55 | 82  | 0.84 | 83  | 2.22 | 84  | 2.02  | 85  | 2.91  | 86  | 1.61  | 87  | 1.97  | 88  | 0.52 | 89  | 0.52 |
| 91  | 0.86 | 92  | 0.24 | 93  | 0.63 | 95  | 0.9   | 96  | 0.71  | 97  | 2.32  | 98  | 1.83  | 99  | 3.41 | 100 | 2.39 |
| 101 | 0.81 | 102 | 0.62 | 103 | 0.31 | 104 | 0.22  | 105 | 0.84  | 106 | 0.38  | 107 | 0.33  | 108 | 0.34 | 109 | 0.99 |
| 110 | 0.66 | 111 | 2.52 | 112 | 4.49 | 113 | 3.02  | 115 | 0.98  | 116 | 0.32  | 117 | 0.44  | 118 | 0.1  | 119 | 0.38 |
| 120 | 0.23 | 121 | 0.75 | 122 | 0.49 | 123 | 0.71  | 124 | 0.8   | 127 | 16.48 | 129 | 0.54  | 130 | 0.22 | 131 | 0.39 |
| 132 | 0.16 | 133 | 0.58 | 134 | 0.35 | 135 | 1.1   | 136 | 0.6   | 137 | 0.99  | 138 | 0.46  | 139 | 0.94 | 140 | 0.52 |
| 141 | 0.59 | 142 | 0.17 | 143 | 0.31 | 144 | 0.24  | 145 | 0.64  | 146 | 0.28  | 147 | 0.68  | 148 | 1.17 | 149 | 2.4  |
| 150 | 1.46 | 151 | 1.01 | 152 | 1.45 | 153 | 1.82  | 154 | 1.42  | 155 | 1.64  | 156 | 0.29  | 157 | 0.24 | 158 | 0.24 |
| 159 | 0.29 | 160 | 0.45 | 161 | 1.95 | 162 | 0.71  | 163 | 1.54  | 164 | 0.5   | 165 | 0.89  | 166 | 0.49 | 167 | 0.81 |
| 168 | 0.6  | 169 | 0.48 | 170 | 0.4  | 171 | 0.36  | 172 | 0.8   | 173 | 1.32  | 174 | 2.54  | 175 | 1.96 | 176 | 1.08 |
| 177 | 0.75 | 178 | 0.74 | 179 | 0.56 | 180 | 0.37  | 181 | 0.61  | 182 | 0.45  | 183 | 0.49  | 184 | 0.31 | 185 | 0.75 |
| 186 | 0.58 | 187 | 1.25 | 188 | 0.74 | 189 | 0.62  | 190 | 0.31  | 191 | 5.28  | 192 | 0.95  | 193 | 0.27 | 194 | 0.14 |
| 195 | 0.42 | 196 | 0.6  | 197 | 1.35 | 198 | 3.4   | 199 | 2.8   | 200 | 3.85  | 201 | 1.5   | 202 | 0.88 | 203 | 0.61 |
| 204 | 0.35 | 205 | 0.54 | 206 | 1.13 | 207 | 0.39  | 208 | 0.44  | 209 | 0.32  | 210 | 0.53  | 211 | 0.84 | 212 | 0.48 |
| 213 | 0.58 | 214 | 0.79 | 215 | 0.34 | 216 | 0.17  | 217 | 0.24  | 218 | 0.11  | 219 | 0.29  | 220 | 0.46 | 221 | 0.62 |
| 222 | 1.49 | 223 | 2.78 | 224 | 8.42 | 225 | 5.52  | 226 | 3.23  | 227 | 1.43  | 228 | 0.48  | 229 | 0.15 | 230 | 0.1  |
| 231 | 0.19 | 232 | 0.58 | 233 | 0.58 | 234 | 0.66  | 235 | 0.55  | 236 | 0.14  | 237 | 0.33  | 238 | 0.38 | 239 | 0.51 |
| 240 | 0.31 | 241 | 0.67 | 242 | 0.23 | 243 | 0.42  | 244 | 0.15  | 245 | 0.18  | 246 | 0.05  | 247 | 0.18 | 248 | 0.49 |
| 249 | 1.46 | 250 | 3.17 | 251 | 5.32 | 252 | 20.69 | 253 | 91.07 | 254 | 100   | 255 | 18.76 | 256 | 2.13 | 257 | 0.38 |

|               |      |     |       |     |       |     |       |     |       |     |       |     |       |     |      |     |
|---------------|------|-----|-------|-----|-------|-----|-------|-----|-------|-----|-------|-----|-------|-----|------|-----|
| 258           | 0.56 | 259 | 2.1   | 260 | 0.81  | 261 | 2.09  | 262 | 0.35  | 263 | 0.2   | 264 | 0.19  | 265 | 0.08 | 266 |
| 267           | 0.1  | 268 | 0.16  | 269 | 0.13  | 270 | 0.27  | 271 | 0.05  | 272 | 0.04  | 273 | 0.27  | 274 | 0.22 | 275 |
| 276           | 0.22 | 277 | 0.39  | 278 | 0.18  | 279 | 0.13  | 280 | 0.3   | 281 | 0.36  | 282 | 0.23  | 284 | 0.6  | 285 |
| 286           | 0.43 | 287 | 1.29  | 288 | 0.37  | 289 | 1.16  | 290 | 0.28  | 291 | 0.17  | 292 | 0.15  | 293 | 0.1  | 293 |
| 294           | 0.09 | 295 | 0.07  | 295 | 0.2   | 296 | 0.07  | 297 | 0.06  | 299 | 0.03  | 301 | 0.04  | 302 | 0.04 | 303 |
| 304           | 0.06 | 305 | 0.09  | 306 | 0.04  | 306 | 0.05  | 307 | 0.08  | 308 | 0.2   | 309 | 0.29  | 310 | 0.14 | 311 |
| 313           | 0.05 | 314 | 0.1   | 316 | 0.15  | 317 | 0.12  | 318 | 0.05  | 319 | 0.11  | 320 | 0.05  | 321 | 0.07 | 323 |
| 323           | 0.05 | 324 | 0.11  | 324 | 0.05  | 325 | 0.05  | 327 | 0.17  | 328 | 0.07  | 329 | 0.1   | 330 | 0.05 | 331 |
| 332           | 4.96 | 333 | 18.21 | 334 | 8.2   | 335 | 17.73 | 336 | 3.51  | 337 | 0.43  | 338 | 0.07  | 339 | 0.14 | 340 |
| 341           | 0.27 | 343 | 0.04  | 344 | 0.05  | 349 | 0.03  | 349 | 0.04  | 350 | 0.05  | 351 | 0.03  | 351 | 0.11 | 352 |
| 353           | 0.08 | 353 | 0.07  | 354 | 0.09  | 355 | 0.06  | 356 | 0.13  | 357 | 0.06  | 358 | 0.05  | 358 | 0.04 |     |
| 8 Peak Value: |      |     |       |     |       |     |       |     |       |     |       |     |       |     |      |     |
| 254           | 100  | 253 | 91.07 | 252 | 20.69 | 255 | 18.76 | 333 | 18.21 | 335 | 17.73 | 127 | 16.48 | 224 | 8.42 |     |

National Center for Organic Mass Spectrometry in Shanghai  
Shanghai Institute of Organic Chemistry  
Chinese Academic of Sciences  
High Resolution MS Data Report

Instrument: Waters Micromass GCT Premier Ionisation Mode: EI+ Electron Energy: 70eV

Card Serial Number: GCT-P-T19-12-0066

Sample Serial Number: 2011770-20191216-KZX-1

Operator: Li

Date: 2019/12/23

Elemental Composition Report

Single Mass Analysis  
Tolerance = 5.0 FPM / DBE: min = -1.5, max = 50.0  
Element prediction: Off

Monoisotopic Mass, Odd and Even Electron Ions  
355 formula(e) evaluated with 4 results within limits (up to 50 closest results for each mass)  
Elements Used:  
C: 0-50 H: 0-80 N: 0-2 O: 0-4 Br: 0-1 10B: 0-2

|          |            |      |      |      |       |                       |  |  |  |  |  |  |  |  |  |  |  |
|----------|------------|------|------|------|-------|-----------------------|--|--|--|--|--|--|--|--|--|--|--|
| Minimum: |            |      |      |      |       |                       |  |  |  |  |  |  |  |  |  |  |  |
| Maximum: |            |      |      |      |       |                       |  |  |  |  |  |  |  |  |  |  |  |
| Mass     | Calc. Mass | 2.0  | 5.0  | -1.5 |       |                       |  |  |  |  |  |  |  |  |  |  |  |
| 332.0370 | 332.0361   | 0.9  | 2.7  | 13.0 | i-FIT | Formula               |  |  |  |  |  |  |  |  |  |  |  |
|          | 332.0368   | 0.2  | 0.6  | 8.0  |       | C18 H13 N Br 10B      |  |  |  |  |  |  |  |  |  |  |  |
|          | 332.0372   | -0.2 | -0.6 | 5.0  |       | C12 H13 N2 O3 Br 10B2 |  |  |  |  |  |  |  |  |  |  |  |
|          | 332.0374   | -0.4 | -1.2 | 25.0 |       | C12 H17 N2 O4 Br      |  |  |  |  |  |  |  |  |  |  |  |
|          |            |      |      |      |       | C25 H4 N2             |  |  |  |  |  |  |  |  |  |  |  |
